# Supplementary material for: Chiral diethyl-EDT-TTF and tetraethyl-BEDT-TTF: synthesis, structural characterization, radical cation salt and charge transfer complexes
Source: Royal Society of Chemistry journal article supplement (doi:10.1039/d2ce00857b), 2022-01-01
Supplement: d2ce00857b1.pdf [file d2ce00857b1.pdf]

## SUPPORTING INFORMATION

### **Chiral diethyl-EDT-TTF and tetraethyl-BEDT-TTF: synthesis, structural characterization, radical cation salt and charge transfer complexes**

Nabil Mroweh,<sup>a</sup> Thomas Cauchy,<sup>a</sup> Nicolas Vanthuyne,<sup>b</sup> and Narcis Avarvari\*<sup>a</sup>

<sup>a</sup> *Univ Angers, CNRS, MOLTECH-Anjou, SFR MATRIX, F-49000 Angers, France. E-mail: [narcis.avarvari@univ-angers.fr](mailto:narcis.avarvari@univ-angers.fr)*

<sup>b</sup> *Aix Marseille Université, CNRS, Centrale Marseille, iSm2, Marseille, France*

## Materials and instrumentation

Reactions were carried out under nitrogen; dry solvents were obtained from distillation machines. Nuclear magnetic resonance spectra were recorded on a Bruker Avance DRX 300 spectrometer operating at 300 MHz for  $^1\text{H}$  and 75 MHz for  $^{13}\text{C}$ . Chemical shifts are expressed in parts per million (ppm) downfield from external TMS. The following abbreviations are used: s, singlet; d, doublet; dq, doublet of quadruplets; m, massif. MALDI-TOF MS spectra were recorded on a Bruker Biflex-III<sup>TM</sup> apparatus, equipped with a 337 nm  $\text{N}_2$  laser. Elemental analysis was performed using a Flash 2000 Fisher Scientific Thermo Electron analyzer.

## Synthesis

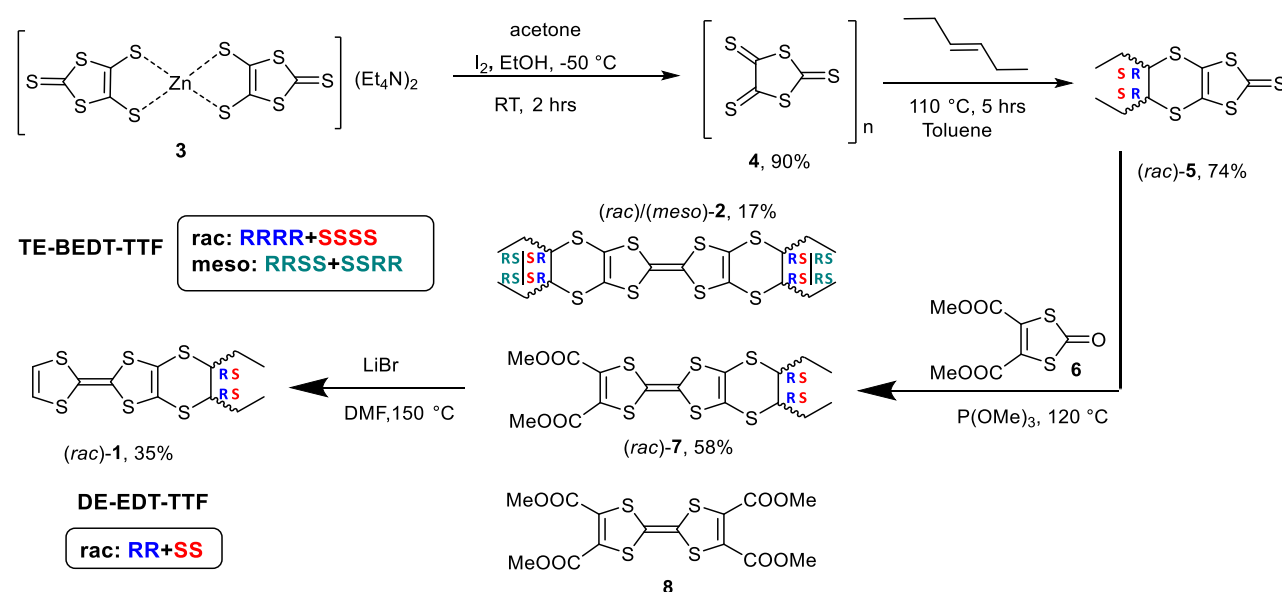

### Details of the absolute configurations of the stereogenic centres

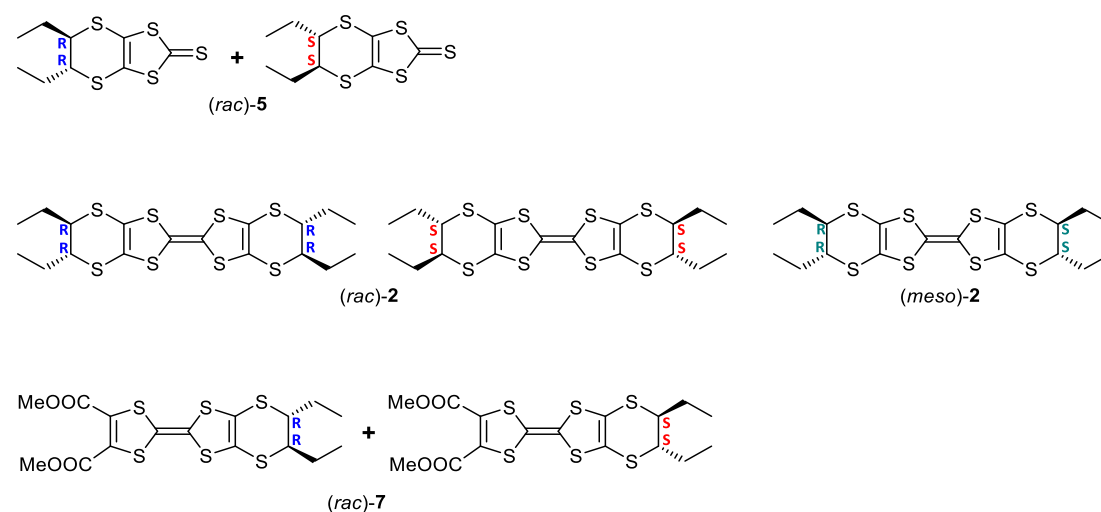

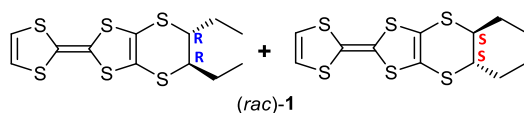

### 1,3-dithiolane-2,4,5-trithione (**4**).

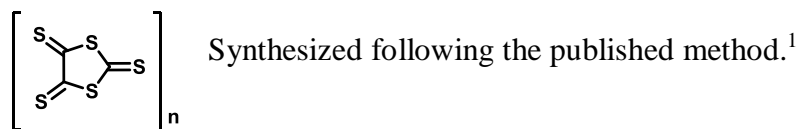

Bis(tetraethylammonium) bis(1,3-dithiole-2-thione-4,5-dithiolato)-zincate **3** (15 g, 21 mmol) was dissolved in acetone (150 mL) and cooled down to -50 °C. I<sub>2</sub> (10.7 g, 42 mmol) dissolved in ethanol (50 mL) was added dropwise to the solution and an orange precipitate starts to form. Then the solution was left under stirring for two hours at room temperature. The solid orange precipitate was filtered then washed with acetone, water, ethanol, diethyl ether and dried to afford **4** as an orange microcrystalline solid (7.1 g, 90 %).

<sup>1</sup> N. Svenstrup and J. Becher, *Synthesis*, 1995, **1995**, 215–235.

**Electrochemistry:**

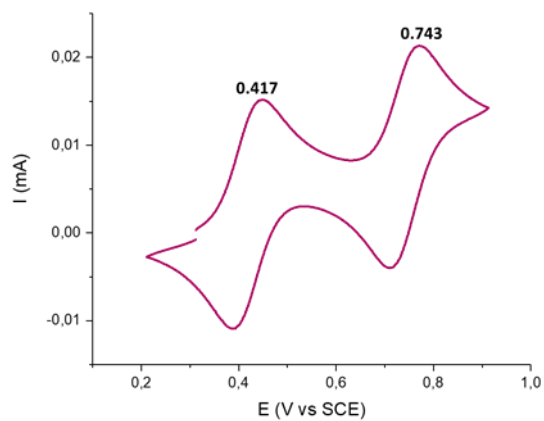

**Fig. S1** Cyclic voltammogram of compound **1**.

Cyclic voltammetry measurements show the classical reversible two single electron oxidation processes into radical cation and dication species at  $\Delta E_{1/2} = +0.42$  and 0.74 V vs SCE, respectively.

**Chiral HPLC separation for compound (*rac*)-DE-EDT-TTF (*rac*)-1**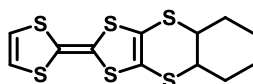**Analytical separation for compound (*rac*)-1**

• The sample is dissolved in dichloromethane, injected on the chiral column, and detected with an UV detector at 254 nm and a circular dichroism detector at 254 nm. The flow-rate is 1 mL/min.

| Column       | Mobile Phase                                    | t <sub>1</sub> | k <sub>1</sub> | t <sub>2</sub> | k <sub>2</sub> | α    | R <sub>s</sub> |
|--------------|-------------------------------------------------|----------------|----------------|----------------|----------------|------|----------------|
| Chiralpak IG | Heptane / ethanol / dichloromethane<br>(90/5/5) | 5.54 (+)       | 0.88           | 6.34 (-)       | 1.15           | 1.31 | 3.40           |

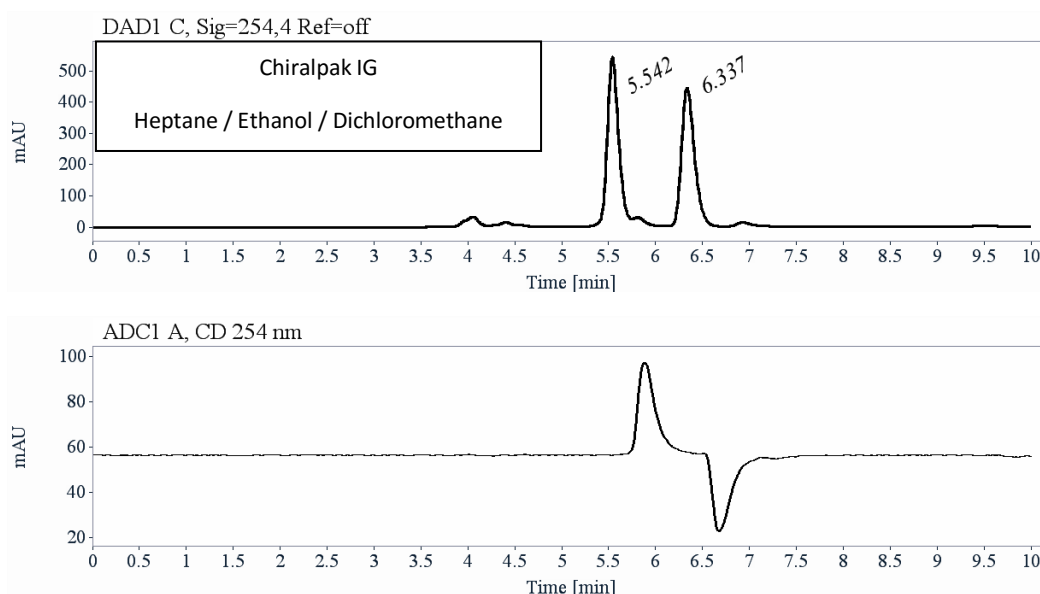

**Fig. S2** Analytical chiral HPLC separation for compound (*rac*)-1.

| RT [min] | Area | Area%  | Capacity Factor | Enantioselectivity | Resolution (USP) |
|----------|------|--------|-----------------|--------------------|------------------|
| 5.54     | 4589 | 51.79  | 0.88            |                    |                  |
| 6.34     | 4272 | 48.21  | 1.15            | 1.31               | 3.40             |
| Sum      | 8861 | 100.00 |                 |                    |                  |

**Semi-preparative separation for compound (*rac*)-1**

- Sample preparation: About 300 mg of compound (*rac*)-DE-EDT-TTF are dissolved in 10 mL of a mixture of dichloromethane and hexane (50/50).
- Chromatographic conditions: Chiralpak IG (250 x 10 mm), heptane / ethanol / dichloromethane (90/5/5) as mobile phase, flow-rate = 5 mL/min, UV detection at 254 nm.
- Injections (stacked): 85 times 120 μL, every 3.5 minutes.
- First fraction: 125 mg of the first eluted ((+, CD 254nm)-enantiomer) with ee > 99 %

Supplementary Material (ESI) for CrystEngComm

- Second fraction: 120 mg of the second eluted ((-, CD 254 nm)-enantiomer) with ee > 97 %
- Chromatograms of the collected fractions:

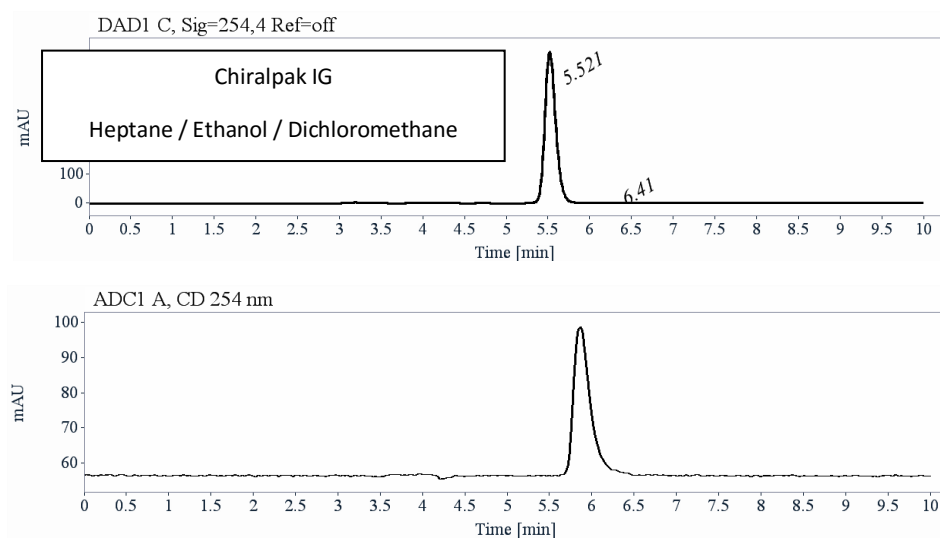

**Fig. S3** Semi-preparative chiral HPLC separation for compound (*R*)-1.

| RT [min] | Area | Area%  |
|----------|------|--------|
| 5.52     | 4780 | 99.70  |
| 6.41     | 14   | 0.30   |
| Sum      | 4794 | 100.00 |

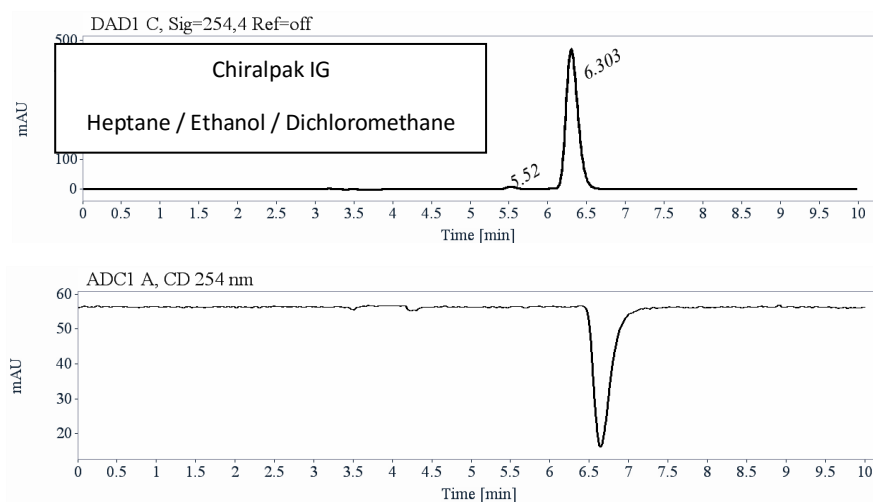

**Fig. S4** Semi-preparative chiral HPLC separation for compound (*S*)-1.

| RT [min] | Area | Area%  |
|----------|------|--------|
| 5.52     | 73   | 1.41   |
| 6.30     | 5135 | 98.59  |
| Sum      | 5208 | 100.00 |

**Optical rotations**

Optical rotations were measured on a Jasco P-2000 polarimeter with a sodium lamp (589 nm), a halogen lamp (578 nm and 546 nm), in a 10 cm cell, thermostated at 25°C with a Peltier controlled cell holder.

| $\lambda$ (nm) | ( <i>R</i> )- <b>1</b><br>first eluted on Chiralpak IG<br>$[\alpha]_{\lambda}^{25}$ (CH <sub>2</sub> Cl <sub>2</sub> , c =0.37) | ( <i>S</i> )- <b>1</b><br>second eluted on Chiralpak IG<br>$[\alpha]_{\lambda}^{25}$ (CH <sub>2</sub> Cl <sub>2</sub> , c =0.33) |
|----------------|---------------------------------------------------------------------------------------------------------------------------------|----------------------------------------------------------------------------------------------------------------------------------|
| 589            | + 191                                                                                                                           | - 188                                                                                                                            |
| 578            | + 198                                                                                                                           | - 196                                                                                                                            |
| 546            | + 223                                                                                                                           | - 221                                                                                                                            |

**Electronic Circular Dichroism (ECD) and UV-Visible spectroscopy**

(*R*)-**1**, first eluted on Chiralpak IG: green solid line, concentration = 1.11 mmol.L<sup>-1</sup> in acetonitrile.

(*S*)-**1**, second eluted on Chiralpak IG: red dotted line, concentration = 1.10 mmol.L<sup>-1</sup> in acetonitrile.

Acquisition parameters: 0.1 nm as intervals, scanning speed 50 nm/min, band width 1 nm, and 3 accumulations per sample.

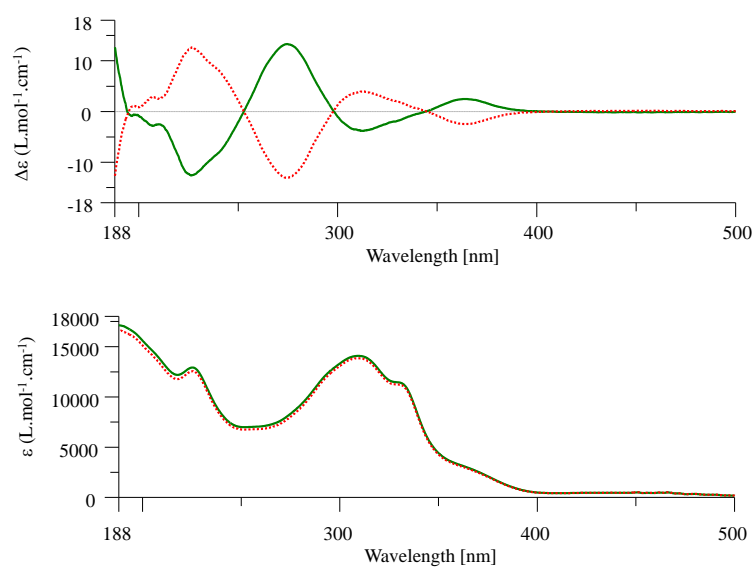

**Fig. S5** CD (top) and UV-Vis (bottom) spectra of (*R*)-**1** (green line) and (*S*)-**1** (red dotted line).

**Chiral HPLC separation for the mixture (*rac*)-TE-BEDT-TTF (*rac*)-2 and (*meso*)-TE-BEDT-TTF (*meso*)-2**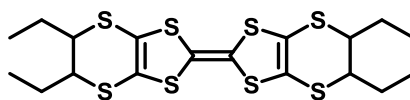**Analytical separation for the mixture (*rac*)-2 and (*meso*)-2**

The sample is dissolved in dichloromethane, injected on the chiral column, and detected with an UV detector at 254 nm and a circular dichroism detector at 254 nm. The flow-rate is 1 mL/min.

**2** contains two enantiomers (*S,S,S,S*)/(*R,R,R,R*) and the *meso* compound (*S,S,R,R*).

| Column       | Mobile Phase                                     | t1               | k1   | t2       | k2   | $\alpha$ | Rs   |
|--------------|--------------------------------------------------|------------------|------|----------|------|----------|------|
| Chiralpak IG | Heptane / ethanol / dichloromethane<br>(85/5/10) | 4.7 (+) and meso | 0.60 | 6.12 (-) | 1.08 | 1.80     | 4.82 |

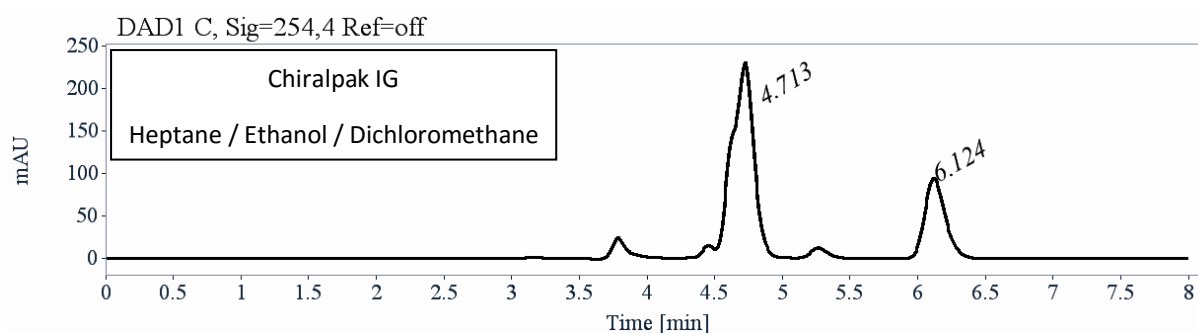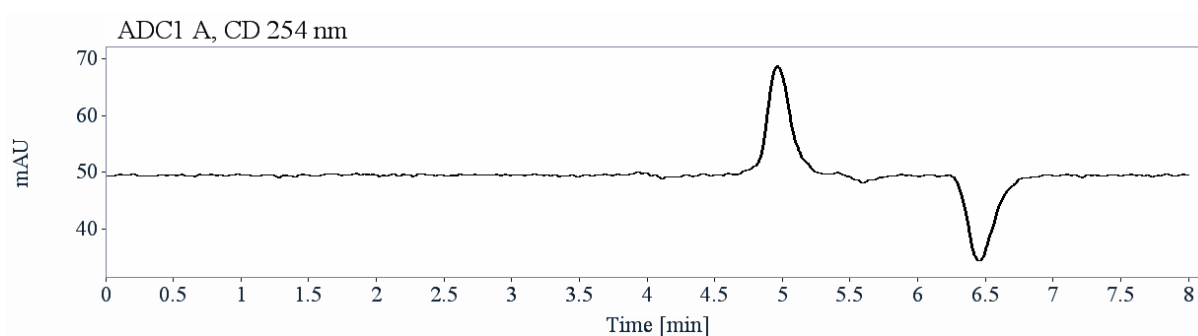

**Fig. S6** Analytical chiral HPLC separation for the mixture (*rac*)-2 and (*meso*)-2.

| RT [min] | Area | Area%  | Capacity Factor | Enantioselectivity | Resolution (USP) |
|----------|------|--------|-----------------|--------------------|------------------|
| 4.71     | 2688 | 72.73  | 0.60            |                    |                  |
| 6.12     | 1008 | 27.27  | 1.08            | 1.80               | 4.82             |
| Sum      | 3696 | 100.00 |                 |                    |                  |



Analytical chiral HPLC separation for the *meso* form and the (+, CD 254 nm)-enantiomer of **2**

• The sample is dissolved in dichloromethane, injected on the chiral column, and detected with an UV detector at 254 nm and a circular dichroism detector at 254 nm. The flow-rate is 1 mL/min.

| Column       | Mobile Phase                | t1       | k1   | t2                    | k2   | $\alpha$ | Rs   |
|--------------|-----------------------------|----------|------|-----------------------|------|----------|------|
| Chiralpak IG | Heptane / ethanol<br>(95/5) | 8.37 (+) | 1.84 | 10.15 ( <i>meso</i> ) | 2.44 | 1.33     | 3.38 |

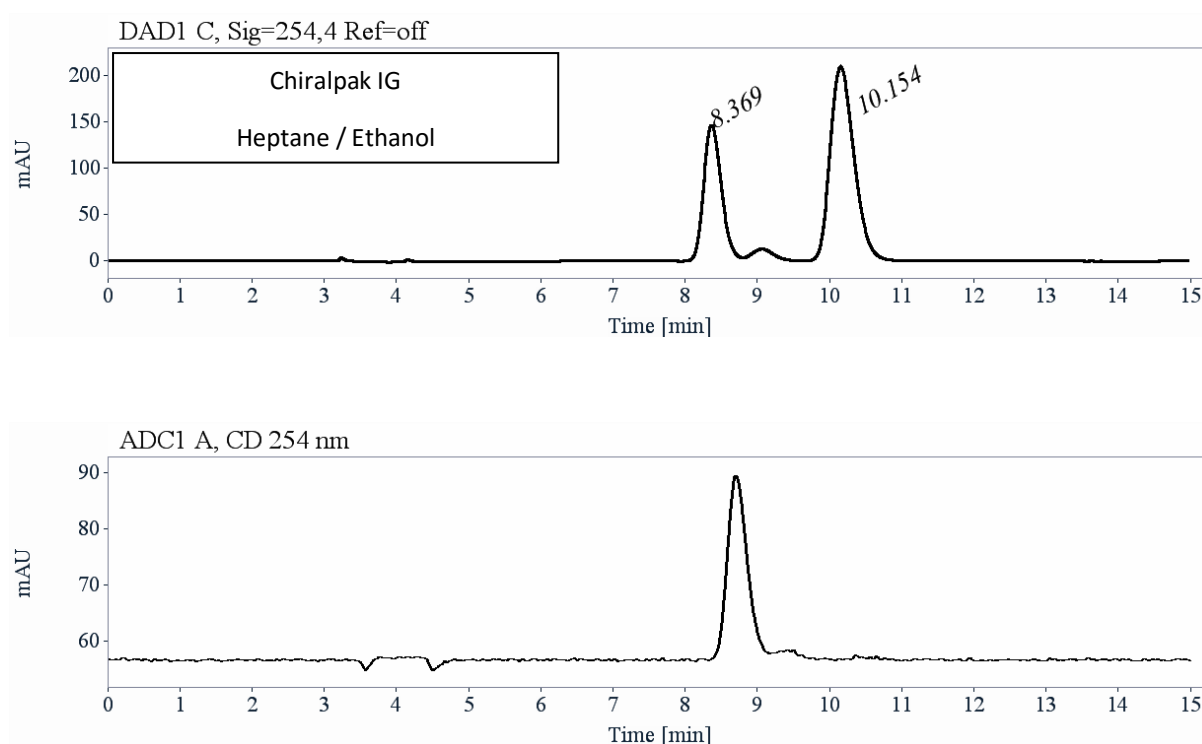

**Fig. S7** Analytical chiral HPLC separation for the mixture (*meso*)-**2** and (*R*)-**2**.

| RT [min] | Area | Area%  | Capacity Factor | Enantioselectivity | Resolution (USP) |
|----------|------|--------|-----------------|--------------------|------------------|
| 8.37     | 2525 | 34.26  | 1.84            |                    |                  |
| 10.15    | 4845 | 65.74  | 2.44            | 1.33               | 3.38             |
| Sum      | 7370 | 100.00 |                 |                    |                  |

Semi-preparative separation for compound 2

*Semi-preparative separation for the mixture of [the meso form and the (+, CD 254 nm)-enantiomer] and the (-, CD 254 nm)-enantiomer of 2*

- Sample preparation: About 145 mg of compound 2 are dissolved in 18 mL of dichloromethane.
- Chromatographic conditions: Chiralpak IG (250 x 10 mm), heptane / ethanol / dichloromethane (85/5/10) as mobile phase, flow-rate = 5 mL/min, UV detection at 254 nm.
- Injections (stacked): 225 times 80  $\mu$ L, every 3.3 minutes.
- First fraction: 88 mg of the first eluted (+, CD 254 nm)-enantiomer and the *meso* compound)
- Second fraction: 32 mg of the second eluted ((-, CD 254 nm)-enantiomer) with ee > 99.5%
- Chromatograms of the second fraction:

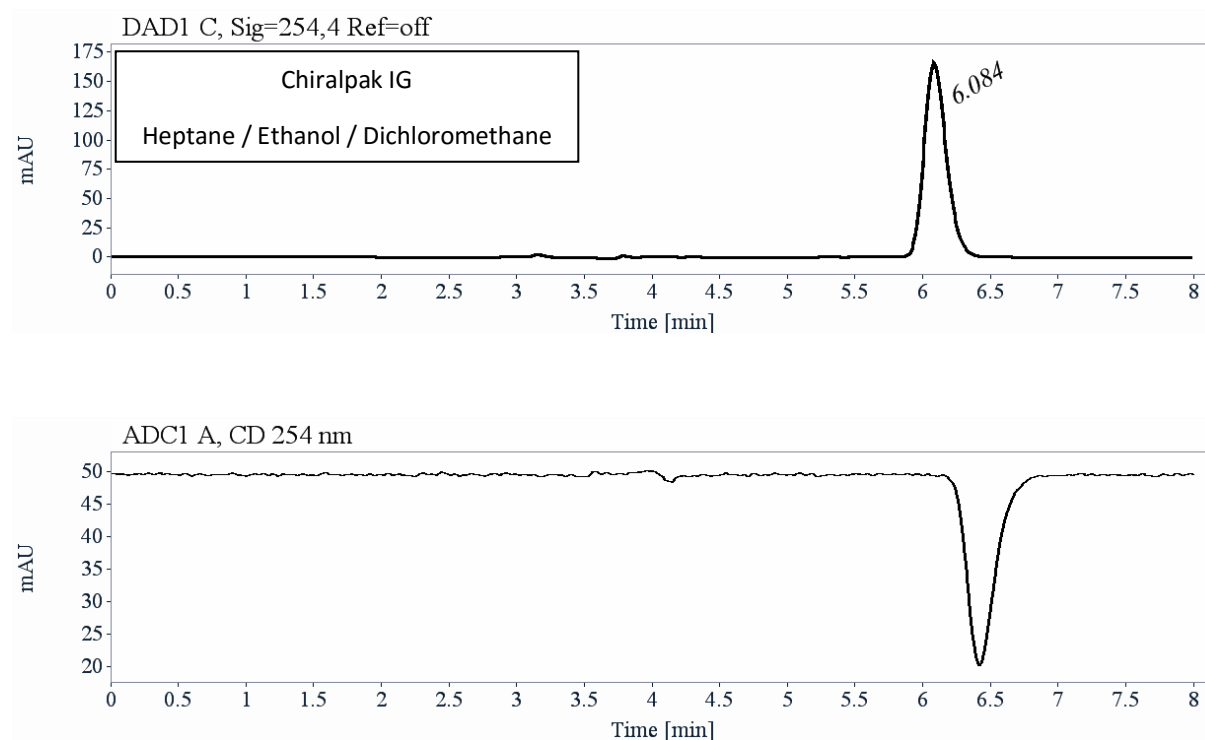

**Fig. S8** Semi-preparative chiral HPLC separation for compound (S)-2.

| RT [min] | Area | Area%  |
|----------|------|--------|
| 6.08     | 1899 | 100.00 |
| Sum      | 1899 | 100.00 |

*Semi-preparative separation for the meso form and the (+, CD 254 nm)-enantiomer of 2*

- Sample preparation: About 88 mg of [the (+, CD 254 nm)-enantiomer and *meso* form] of compound **2** are dissolved in 12 mL of dichloromethane.
- Chromatographic conditions: Chiralpak IG (250 x 10 mm), heptane / ethanol (95/5) as mobile phase, flow-rate = 5 mL/min, UV detection at 254 nm.
- Injections (stacked): 240 times 50  $\mu$ L, every 4 minutes.
- First fraction: 26 mg of the first eluted (+, CD 254 nm)-enantiomer) with ee > 99.5%
- Second fraction: 54 mg of the *meso* form
- Chromatograms of the collected fractions:

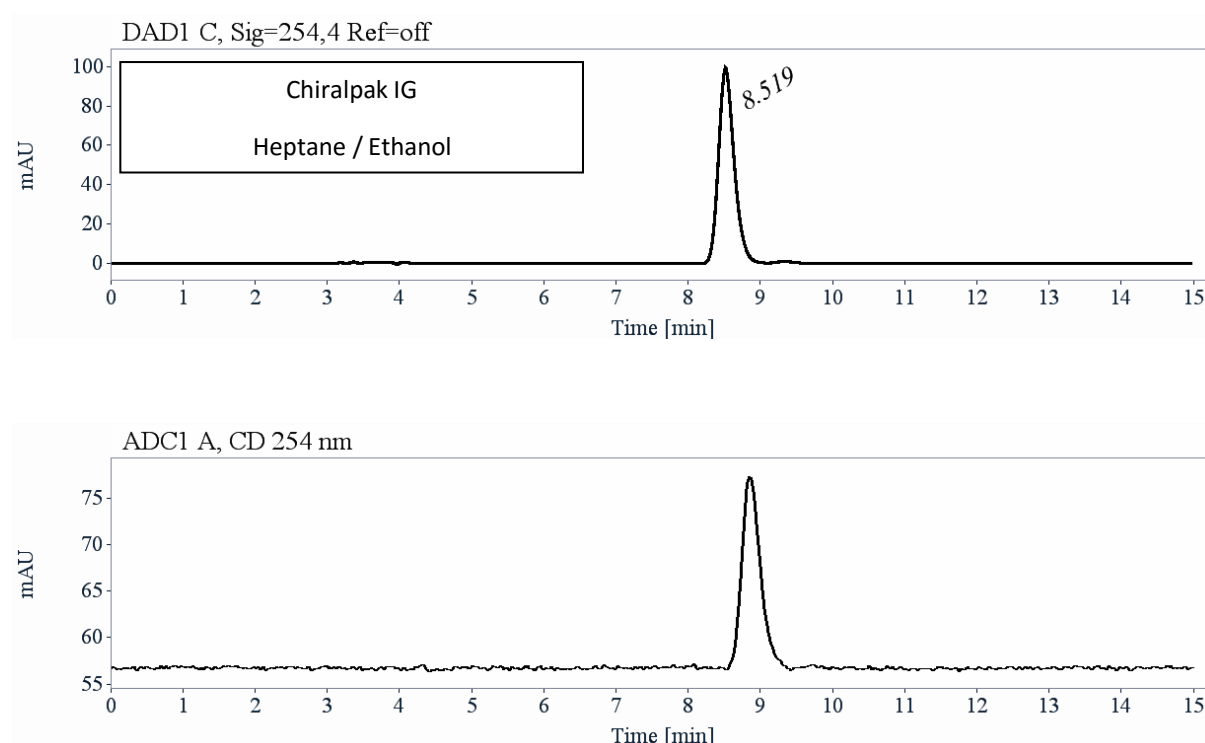

**Fig. S9** Semi-preparative chiral HPLC separation for compound (*R*)-**2**.

| RT [min] | Area | Area%  |
|----------|------|--------|
| 8.52     | 1505 | 100.00 |
| Sum      | 1505 | 100.00 |

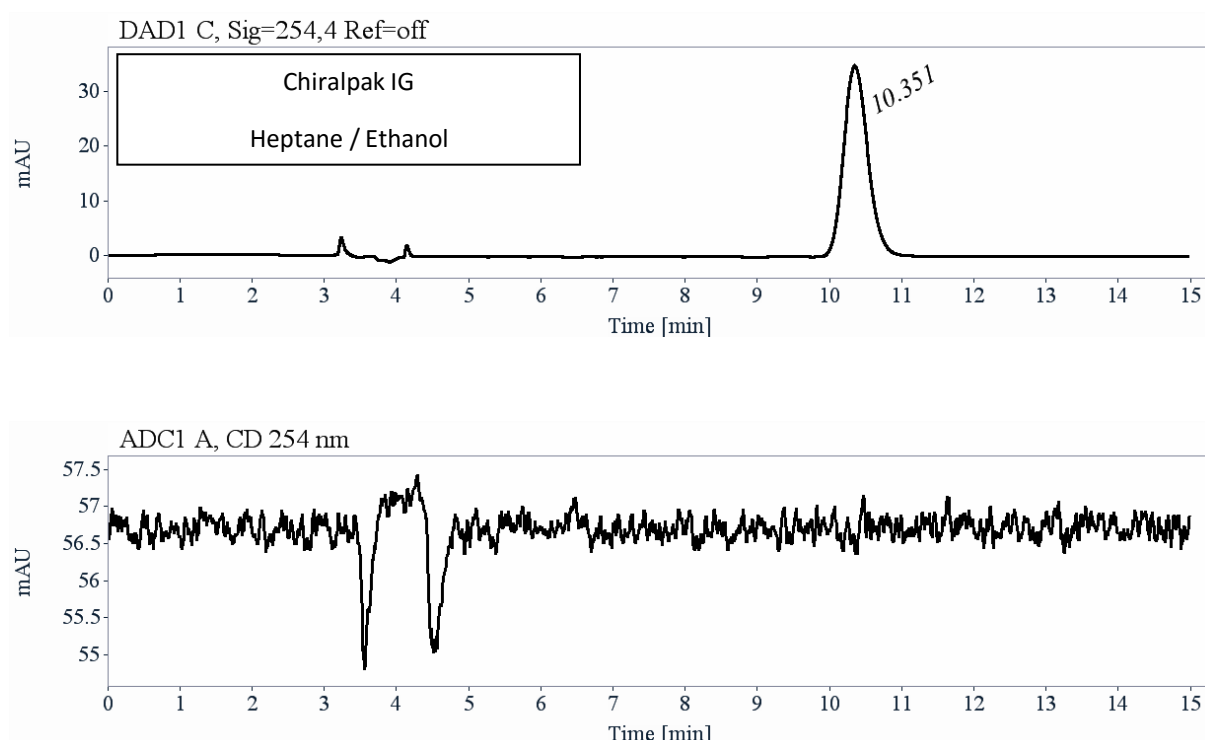

**Fig. S10** Semi-preparative chiral HPLC separation for compound (*meso*)-2.

| RT [min] | Area | Area%  |
|----------|------|--------|
| 10.35    | 820  | 100.00 |
| Sum      | 820  | 100.00 |

### Optical rotations

Optical rotations were measured on a Jasco P-2000 polarimeter with a sodium lamp (589 nm), a halogen lamp (578 nm and 546 nm), in a 10 cm cell, thermostated at 25°C with a Peltier controlled cell holder.

| $\lambda$ (nm) | ( <i>R</i> )-2                                                                                | ( <i>S</i> )-2                                                                                 |
|----------------|-----------------------------------------------------------------------------------------------|------------------------------------------------------------------------------------------------|
|                | first eluted on Chiralpak IG<br>$[\alpha]_D^{25}$ (CH <sub>2</sub> Cl <sub>2</sub> , c =0.14) | second eluted on Chiralpak IG<br>$[\alpha]_D^{25}$ (CH <sub>2</sub> Cl <sub>2</sub> , c =0.14) |
| 589            | + 202                                                                                         | - 202                                                                                          |
| 578            | + 210                                                                                         | - 210                                                                                          |
| 546            | + 240                                                                                         | - 240                                                                                          |

### Electronic Circular Dichroism

ECD and UV spectra were measured on a JASCO J-815 spectrometer equipped with a JASCO Peltier cell holder PTC-423 to maintain the temperature at  $25.0 \pm 0.2^\circ\text{C}$ . A CD quartz cell of 1 mm of optical pathlength was used. The CD spectrometer was purged with nitrogen before recording each spectrum, which was baseline subtracted.

The baseline was always measured for the same solvent and in the same cell as the samples.

The spectra are presented without smoothing and further data processing.

(*R*)-**2**, first eluted on Chiralpak IG: green solid line, concentration =  $0.646 \text{ mmol.L}^{-1}$  in Dichloromethane.

(*S*)-**2**, second eluted on Chiralpak IG: red dotted line, concentration =  $0.644 \text{ mmol.L}^{-1}$  in Dichloromethane.

Acquisition parameters: 0.1 nm as intervals, scanning speed 50 nm/min, band width 1 nm, and 3 accumulations per sample.

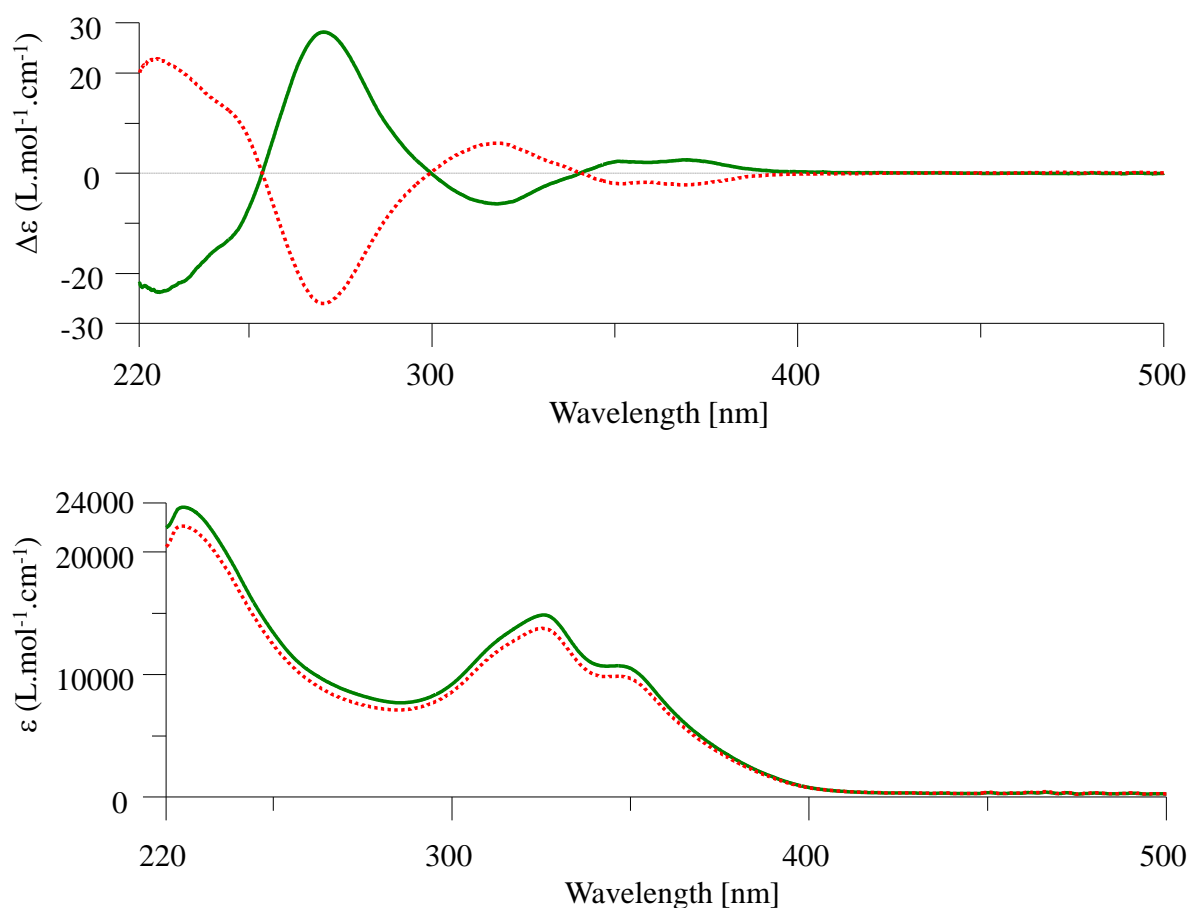

**Fig. S11** CD (top) and UV-Vis (bottom) spectra of (*R*)-**2** (green line) and (*S*)-**2** (red dotted line).

**X-ray structure determinations****Table S1** Crystallographic data, details of data collection and structure refinement parameters for **1** and its derivatives.

|                                                                                            | [( <i>rac</i> )-1]                              | [( <i>S</i> )-1]                               | [( <i>R</i> )-1]                               | [( <i>rac</i> )-1]PF <sub>6</sub>                                            | [( <i>S</i> )-1]PF <sub>6</sub>                                              | [( <i>R</i> )-1]TCNQF <sub>4</sub>                                           |
|--------------------------------------------------------------------------------------------|-------------------------------------------------|------------------------------------------------|------------------------------------------------|------------------------------------------------------------------------------|------------------------------------------------------------------------------|------------------------------------------------------------------------------|
| formula                                                                                    | C <sub>24</sub> H <sub>28</sub> S <sub>12</sub> | C <sub>12</sub> H <sub>14</sub> S <sub>6</sub> | C <sub>12</sub> H <sub>14</sub> S <sub>6</sub> | C <sub>12</sub> H <sub>14</sub> F <sub>6</sub> P <sub>6</sub> S <sub>6</sub> | C <sub>12</sub> H <sub>14</sub> F <sub>6</sub> P <sub>6</sub> S <sub>6</sub> | C <sub>24</sub> H <sub>14</sub> F <sub>4</sub> N <sub>4</sub> S <sub>6</sub> |
| <i>M</i> [g mol <sup>-1</sup> ]                                                            | 701.18                                          | 350.59                                         | 350.59                                         | 495.56                                                                       | 495.56                                                                       | 626.75                                                                       |
| <i>T</i> [K]                                                                               | 297(1)                                          | 298(2)                                         | 150.01(10)                                     | 293(2)                                                                       | 293(2)                                                                       | 149.9(5)                                                                     |
| crystal system                                                                             | orthorhombic                                    | Monoclinic                                     | Monoclinic                                     | Triclinic                                                                    | Triclinic                                                                    | Triclinic                                                                    |
| space group                                                                                | <i>Pna</i> 2 <sub>1</sub>                       | <i>P</i> 2 <sub>1</sub>                        | <i>P</i> 2 <sub>1</sub>                        | <i>P</i> -1                                                                  | <i>P</i> 1                                                                   | <i>P</i> 1                                                                   |
| <i>a</i> [Å]                                                                               | 31.2707(11)                                     | 6.1770(3)                                      | 6.1216(3)                                      | 8.0122(5)                                                                    | 8.1638(4)                                                                    | 7.6595(1)                                                                    |
| <i>b</i> [Å]                                                                               | 9.2527(4)                                       | 10.9534(6)                                     | 10.8073(5)                                     | 15.3709(9)                                                                   | 15.558(3)                                                                    | 14.5463(2)                                                                   |
| <i>c</i> [Å]                                                                               | 10.9540(4)                                      | 11.7837(8)                                     | 11.7028(6)                                     | 16.0099(10)                                                                  | 16.203(3)                                                                    | 22.7605(3)                                                                   |
| $\alpha$ [°]                                                                               | 90                                              | 90                                             | 90                                             | 68.821(5)                                                                    | 68.670(10)                                                                   | 95.079(1)                                                                    |
| $\beta$ [°]                                                                                | 90                                              | 96.154(5)                                      | 95.501(4)                                      | 88.312(5)                                                                    | 88.608(8)                                                                    | 99.545(1)                                                                    |
| $\gamma$ [°]                                                                               | 90                                              | 90                                             | 90                                             | 86.553(5)                                                                    | 87.047(8)                                                                    | 90.995(1)                                                                    |
| <i>V</i> [Å <sup>3</sup> ]                                                                 | 3169.4(2)                                       | 792.68(8)                                      | 770.67(7)                                      | 1835.1(2)                                                                    | 1914.4(5)                                                                    | 2489.66(6)                                                                   |
| <i>Z</i>                                                                                   | 4                                               | 2                                              | 2                                              | 4                                                                            | 4                                                                            | 4                                                                            |
| $\rho_{\text{calcd}}$ [g/cm <sup>3</sup> ]                                                 | 1.469                                           | 1.469                                          | 1.511                                          | 1.794                                                                        | 1.719                                                                        | 1.672                                                                        |
| $\mu$ [mm <sup>-1</sup> ]                                                                  | 7.802                                           | 7.798                                          | 8.021                                          | 8.234                                                                        | 0.848                                                                        | 5.570                                                                        |
| Flack parameter                                                                            | 0.03(4)                                         | -0.03(4)                                       | -0.05(4)                                       | -                                                                            | 0.05(4)                                                                      | 0.043(12)                                                                    |
| goodness-of-fit on $F^2$                                                                   | 1.027                                           | 1.020                                          | 0.909                                          | 1.039                                                                        | 1.016                                                                        | 1.039                                                                        |
| final <i>R</i> <sub>1</sub> / <i>wR</i> <sub>2</sub> [ <i>I</i> > 2 $\sigma$ ( <i>I</i> )] | 0.0441/ 0.1032                                  | 0.0357/0.0942                                  | 0.0362/0.0946                                  | 0.1273/0.3201                                                                | 0.0491/0.102                                                                 | 0.0460/ 0.1242                                                               |
| <i>R</i> <sub>1</sub> / <i>wR</i> <sub>2</sub> (all data)                                  | 0.0568/ 0.1136                                  | 0.0392/0.0973                                  | 0.0394/0.0982                                  | 0.1408/0.3345                                                                | 0.0884/0.1157                                                                | 0.0477/ 0.1285                                                               |
| CCDC numbers                                                                               | 2179911                                         | 2179912                                        | 2179913                                        |                                                                              | 2179914                                                                      | 2179915                                                                      |

**Table S2** Crystallographic data, details of data collection and structure refinement parameters for **2** and its derivatives.

|                                                                                            | [( <i>rac</i> )-2]                             | [( <i>S</i> )-2]                               | [( <i>R</i> )-2]                               | [( <i>meso</i> )-2]                            | [( <i>meso</i> )-2]TCNQF <sub>4</sub>                                        |
|--------------------------------------------------------------------------------------------|------------------------------------------------|------------------------------------------------|------------------------------------------------|------------------------------------------------|------------------------------------------------------------------------------|
| formula                                                                                    | C <sub>18</sub> H <sub>24</sub> S <sub>8</sub> | C <sub>15</sub> H <sub>12</sub> F <sub>2</sub> N <sub>2</sub> S <sub>4</sub> |
| <i>M</i> [g mol <sup>-1</sup> ]                                                            | 496.85                                         | 496.85                                         | 496.85                                         | 496.85                                         | 386.51                                                                       |
| <i>T</i> [K]                                                                               | 293(2)                                         | 293(2)                                         | 149.8(7)                                       | 293(2)                                         | 293(2)                                                                       |
| crystal system                                                                             | Tetragonal                                     | Monoclinic                                     | Monoclinic                                     | Monoclinic                                     | Triclinic                                                                    |
| space group                                                                                | <i>P</i> 4 <sub>1</sub> 2 <sub>1</sub> 2       | <i>P</i> 2 <sub>1</sub>                        | <i>P</i> 2 <sub>1</sub>                        | <i>P</i> 2 <sub>1</sub> / <i>c</i>             | <i>P</i> -1                                                                  |
| <i>a</i> [Å]                                                                               | 13.7056(2)                                     | 8.2148(4)                                      | 8.0812(2)                                      | 6.1944(3)                                      | 7.0619(6)                                                                    |
| <i>b</i> [Å]                                                                               | 13.7056(2)                                     | 10.2029(4)                                     | 10.1708(2)                                     | 11.0828(5)                                     | 10.1071(10)                                                                  |
| <i>c</i> [Å]                                                                               | 23.9209(5)                                     | 13.8985(8)                                     | 13.7159(3)                                     | 16.5640(9)                                     | 12.5228(11)                                                                  |
| $\alpha$ [°]                                                                               | 90                                             | 90                                             | 90                                             | 90                                             | 93.828(8)                                                                    |
| $\beta$ [°]                                                                                | 90                                             | 93.622(5)                                      | 92.804(2)                                      | 92.272(4)                                      | 101.369(7)                                                                   |
| $\gamma$ [°]                                                                               | 90                                             | 90                                             | 90°                                            | 90                                             | 108.957(8)                                                                   |
| <i>V</i> [Å <sup>3</sup> ]                                                                 | 4493.38(16)                                    | 1162.57(10)                                    | 1125.99(4)                                     | 1136.25(10)                                    | 820.47(14)                                                                   |
| <i>Z</i>                                                                                   | 8                                              | 2                                              | 2                                              | 4                                              | 2                                                                            |
| $\rho_{\text{calcd}}$ [g/cm <sup>3</sup> ]                                                 | 1.469                                          | 1.419                                          | 1.465                                          | 1.452                                          | 1.564                                                                        |
| $\mu$ [mm <sup>-1</sup> ]                                                                  | 7.370                                          | 7.121                                          | 7.352                                          | 7.286                                          | 5.504                                                                        |
| Flack parameter                                                                            | 0.00(4)                                        | -0.03(4)                                       | -0.024(17)                                     | -                                              | -                                                                            |
| goodness-of-fit on $F^2$                                                                   | 1.153                                          | 1.070                                          | 1.050                                          | 1.065                                          | 1.035                                                                        |
| final <i>R</i> <sub>1</sub> / <i>wR</i> <sub>2</sub> [ <i>I</i> > 2 $\sigma$ ( <i>I</i> )] | 0.0486 / 0.1004                                | 0.0441/0.1121                                  | 0.0300/0.0743                                  | 0.0693/ 0.1612                                 | 0.0678/ 0.1636                                                               |
| <i>R</i> <sub>1</sub> / <i>wR</i> <sub>2</sub> (all data)                                  | 0.0579 / 0.1045                                | 0.0555/0.1166                                  | 0.0316/0.0762                                  | 0.0786/ 0.1696                                 | 0.0912/ 0.1856                                                               |
| CCDC numbers                                                                               | 2179916                                        | 2179917                                        | 2179918                                        | 2179919                                        | 2179920                                                                      |

**Crystal structures of neutral DE-EDT-TTF donors****(R)-1**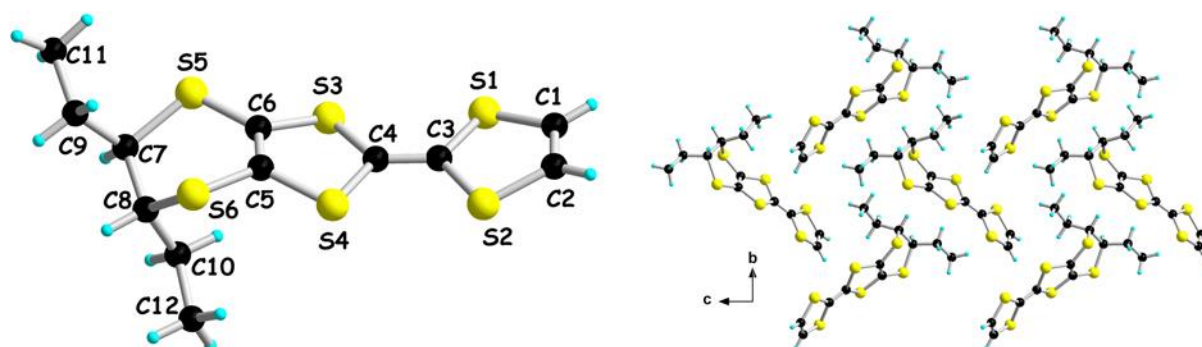

**Fig. S12** Molecular structure of (*R*)-1 together with the atom numbering scheme (left) and a packing diagram in the *bc* plane side view (right).

**(rac)-1**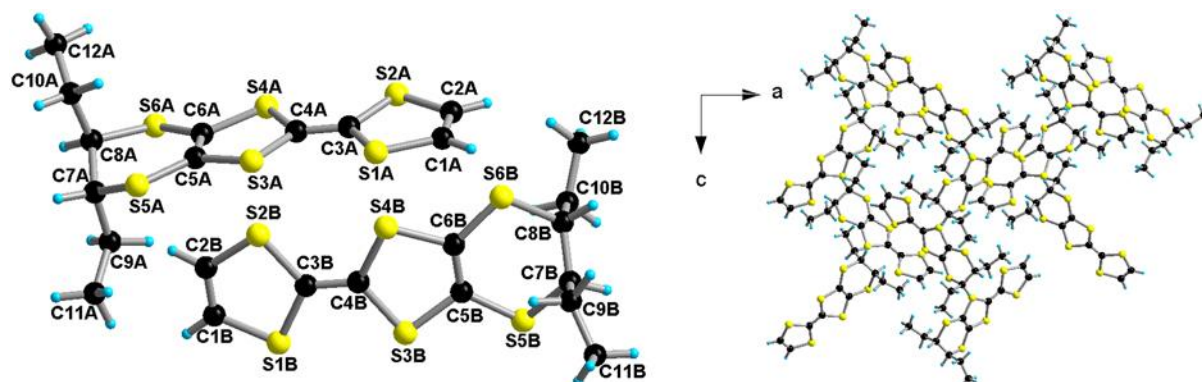

**Fig. S13** Molecular structure of (*rac*)-1 together with the atom numbering scheme; the two independent molecules shown have (*R*) configuration (left) and a packing diagram in the *ac* plane (right).

**Table S3** Selected bond lengths for enantiopure and racemic **1**.

| Bond lengths (Å) |         |                 |       |               |       |               |  |
|------------------|---------|-----------------|-------|---------------|-------|---------------|--|
|                  |         | <i>(rac)</i> -1 |       | <i>(S)</i> -1 |       | <i>(R)</i> -1 |  |
| A                | C3A—C4A | 1.334(8)        | C3—C4 | 1.341(6)      | C3—C4 | 1.339(7)      |  |
|                  | S1A—C3A | 1.758(6)        | S1—C3 | 1.756(5)      | S1—C3 | 1.751(6)      |  |
|                  | S2A—C3A | 1.752(6)        | S2—C3 | 1.753(5)      | S2—C3 | 1.763(6)      |  |
|                  | S3A—C4A | 1.749(6)        | S3—C4 | 1.757(4)      | S3—C4 | 1.762(5)      |  |
|                  | S4A—C4A | 1.751(6)        | S4—C4 | 1.754(5)      | S4—C4 | 1.761(5)      |  |
| B                | C3B—C4B | 1.339(8)        |       |               |       |               |  |
|                  | S1B—C3B | 1.744(7)        |       |               |       |               |  |
|                  | S2B—C3B | 1.760(6)        |       |               |       |               |  |
|                  | S3B—C4B | 1.752(6)        |       |               |       |               |  |
|                  | S4B—C4B | 1.756(6)        |       |               |       |               |  |

**Crystal structures of neutral TE-BEDT-TTF donors**

(*S*)-2

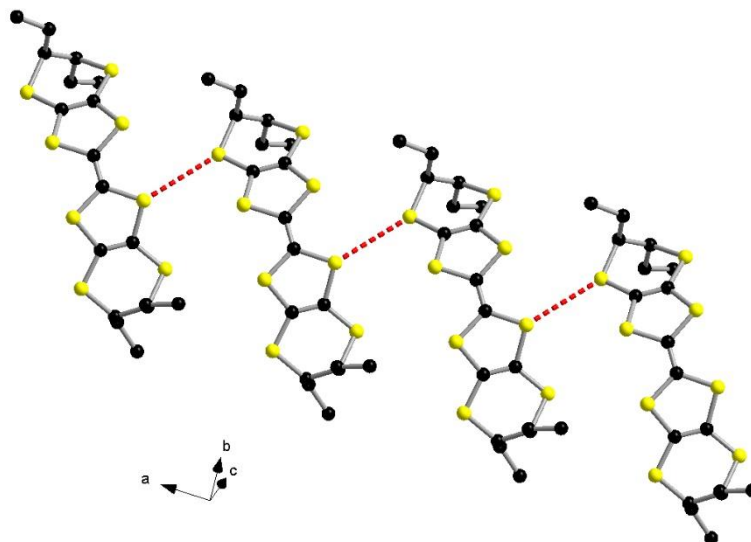

**Fig. S14** Packing diagram of (*S*)-2 showing the shortest S...S intermolecular distances (3.77 Å) highlighted as red dotted lines, along the *a* direction.

(*R*)-2

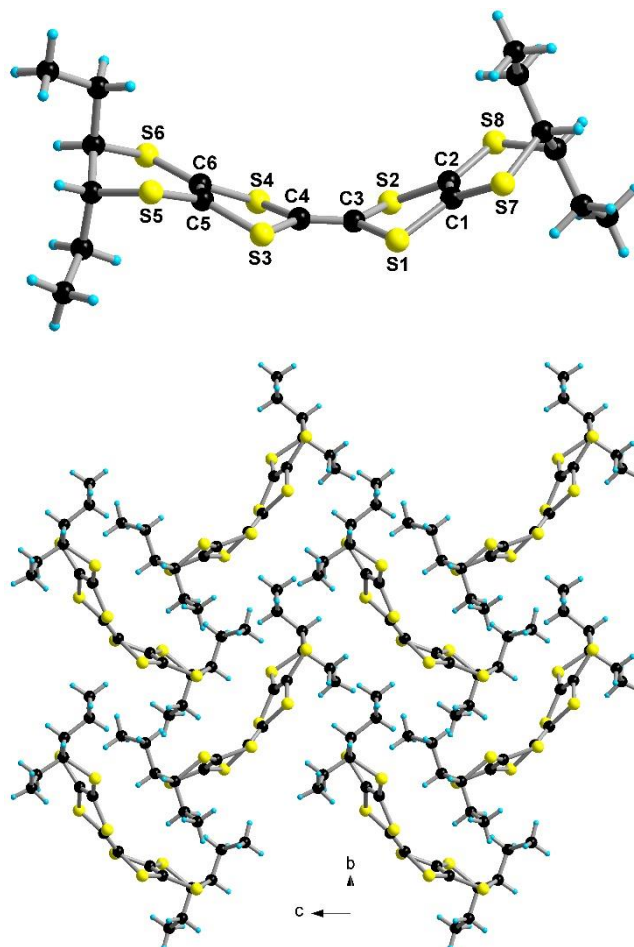



**Fig. S15** Molecular structure of (*R*)-**2** together with the atom numbering scheme (top) and a packing diagram in the *bc* plane (right). The folding angles around the internal S⋯S hinges are 30.9° (S1⋯S2) and 23.6° (S3⋯S4).

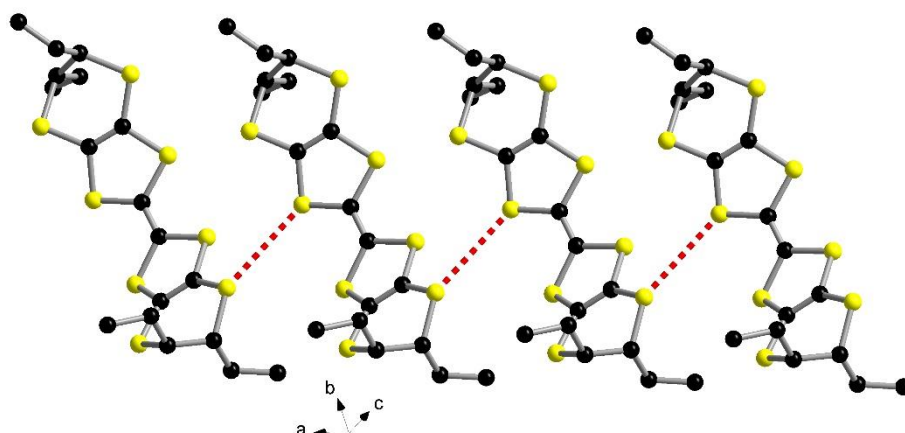

**Fig. S16** Packing diagram of (*R*)-**2** showing the shortest S⋯S intermolecular distances (3.70 Å) highlighted as red dotted lines, along the *a* direction.

*(meso)*-**2**

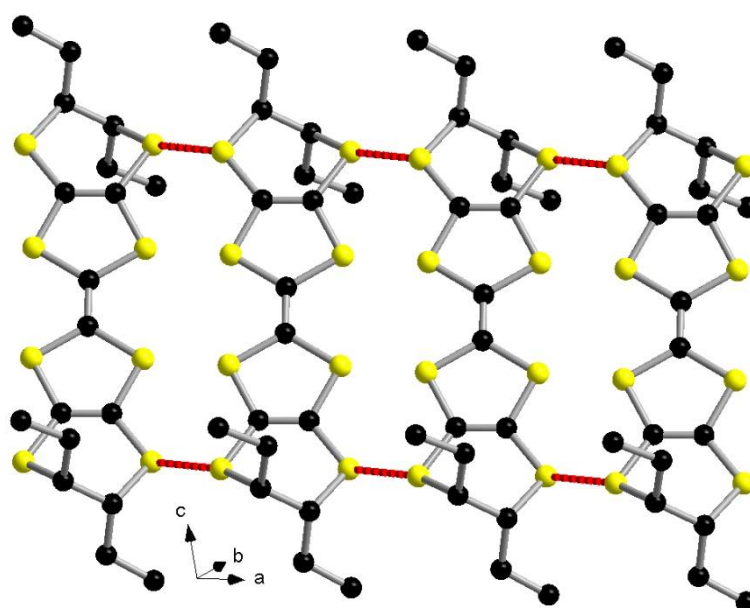

**Fig. S17** Packing diagram of (*meso*)-**2** showing the shortest S⋯S intermolecular distances (3.84 Å) highlighted as red dotted lines, along the *a* direction.

**Table S4** Selected bond lengths for racemic, enantiopure and meso **2**.

| Bond lengths (Å) |         |           |               |           |               |          |                  |          |
|------------------|---------|-----------|---------------|-----------|---------------|----------|------------------|----------|
| <i>(rac)</i> -2  |         |           | <i>(R)</i> -2 |           | <i>(S)</i> -2 |          | <i>(meso)</i> -2 |          |
| A                | C3A—C4A | 1.358(10) | C3—C4         | 1.332(10) | C3—C4         | 1.338(5) | C3—C3            | 1.345(8) |
|                  | S1A—C3A | 1.764(6)  | S1—C3         | 1.755(8)  | S1—C3         | 1.757(4) | S1—C3            | 1.760(4) |
|                  | S2A—C3A | 1.757(6)  | S2—C3         | 1.762(7)  | S2—C3         | 1.758(4) | S2—C3            | 1.756(4) |
| B                | C3B—C4B | 1.358(10) | S3—C4         | 1.763(8)  | S3—C4         | 1.755(4) |                  |          |
|                  | S1B—C3B | 1.753(4)  | S4—C4         | 1.762(8)  | S4—C4         | 1.757(4) |                  |          |
|                  | S3B—C4B | 1.752(4)  |               |           |               |          |                  |          |

### Radical cation salts:

[(*S*)-1]PF<sub>6</sub>

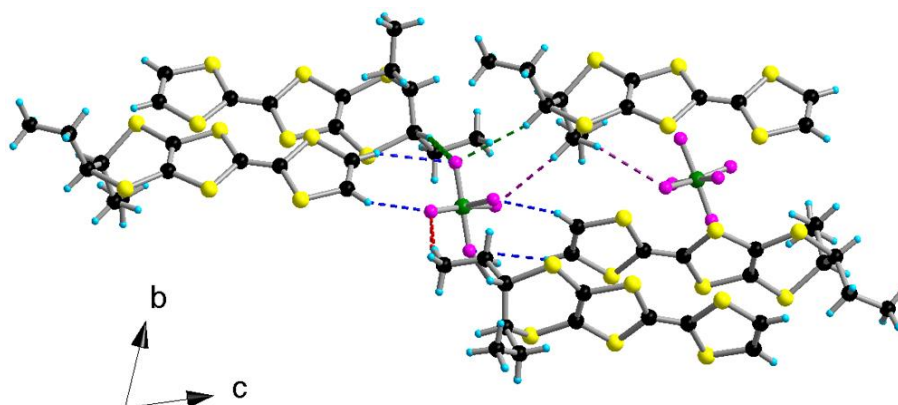

**Fig. S18** Packing diagram of [(*S*)-1]PF<sub>6</sub> in the *bc* plane, with an emphasis on the C—H···F short contacts: blue dotted lines for CH vinyl (2.47-2.54-2.80-2.87 Å), red dotted lines for Me (2.44-2.87 Å), green dotted lines for H<sub>CH</sub> (2.48-2.85 Å) and violet dotted lines for CH<sub>2</sub> (2.67-2.81 Å).

**Table S5** Selected bond lengths for [(*S*)-1]PF<sub>6</sub>.

| Bond lengths (Å) |         |           |   |         |           |
|------------------|---------|-----------|---|---------|-----------|
| A                | C3A—C4A | 1.394(12) | C | C3C—C4C | 1.392(11) |
|                  | S1A—C3A | 1.713(9)  |   | S1C—C3C | 1.739(9)  |
|                  | S2A—C3A | 1.729(8)  |   | S2C—C3C | 1.729(9)  |
|                  | S3A—C4A | 1.736(9)  |   | S3C—C4C | 1.715(9)  |
|                  | S4A—C4A | 1.712(10) |   | S4C—C4C | 1.717(9)  |
| B                | C3B—C4B | 1.411(12) | D | C3D—C4D | 1.406(11) |
|                  | S1B—C3B | 1.710(9)  |   | S1D—C3D | 1.711(8)  |
|                  | S2B—C3B | 1.727(9)  |   | S2D—C3D | 1.717(9)  |
|                  | S3B—C4B | 1.723(9)  |   | S3D—C4D | 1.719(8)  |
|                  | S4B—C4B | 1.711(9)  |   | S4D—C4D | 1.714(9)  |

**Charge transfer complexes:**[(*R*)-1]TCNQF<sub>4</sub>: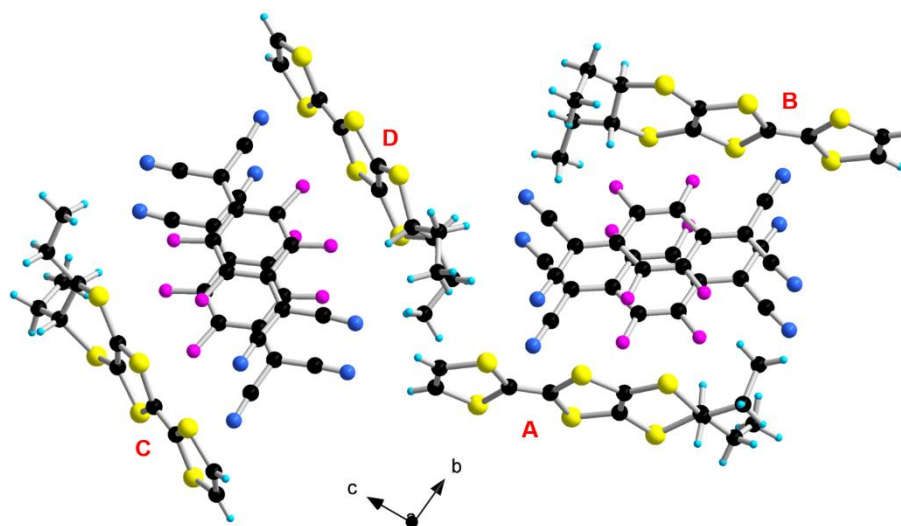**Fig. S19** Four independent donors and acceptors in the asymmetric unit of [(*R*)-1]TCNQF<sub>4</sub>.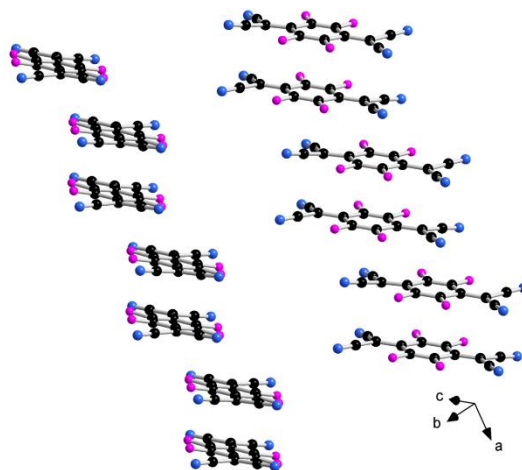**Fig. S20** Packing of TCNQF<sub>4</sub> in the structure of [(*R*)-1]TCNQF<sub>4</sub>, showing the lateral and longitudinal shifts between the dimeric units.**Table S6** Selected C=C and C–S internal bond distances for [(*R*)-1]TCNQF<sub>4</sub>.

| [( <i>R</i> )-1]TCNQF <sub>4</sub> |         |          |   |         |          |
|------------------------------------|---------|----------|---|---------|----------|
| A                                  | C3A–C4A | 1.404(7) | C | C3C–C4C | 1.392(7) |
|                                    | S1A–C3A | 1.722(6) |   | S1C–C3C | 1.716(5) |
|                                    | S2A–C3A | 1.705(6) |   | S2C–C3C | 1.717(5) |
|                                    | S3A–C4A | 1.709(5) |   | S3C–C4C | 1.721(5) |

|          |                |          |          |                |          |
|----------|----------------|----------|----------|----------------|----------|
|          | <b>S4A—C4A</b> | 1.709(5) |          | <b>S4C—C4C</b> | 1.727(5) |
| <b>B</b> | <b>C3B—C4B</b> | 1.394(7) | <b>D</b> | <b>C3D—C4D</b> | 1.387(7) |
|          | <b>S1B—C3B</b> | 1.720(5) |          | <b>S1D—C3D</b> | 1.726(5) |
|          | <b>S2B—C3B</b> | 1.716(6) |          | <b>S2D—C3D</b> | 1.713(5) |
|          | <b>S3B—C4B</b> | 1.715(6) |          | <b>S3D—C4D</b> | 1.719(5) |
|          | <b>S4B—C4B</b> | 1.720(6) |          | <b>S4D—C4D</b> | 1.719(5) |

[(*meso*)-2]TCNQF<sub>4</sub>

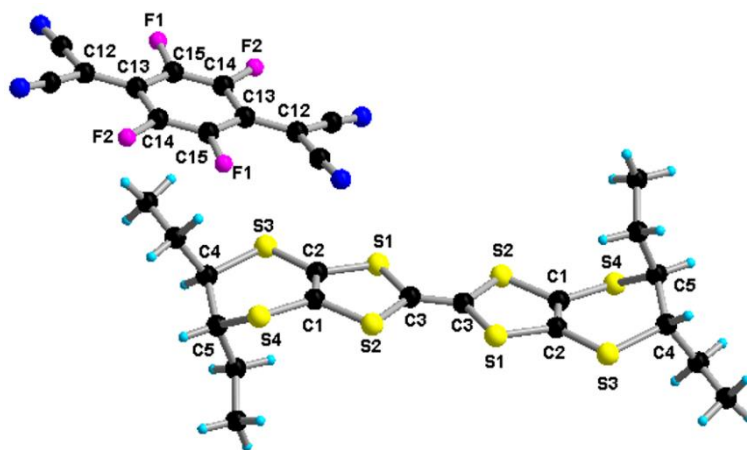

**Fig. S21** Molecular structure of [(*meso*)-2]TCNQF<sub>4</sub> along with a partial atom numbering scheme.

**Table S7** C=C and C–S internal bond distances for [(*meso*)-2]TCNQF<sub>4</sub>.

| Bond length(Å) |           |
|----------------|-----------|
| <b>C3—C3*</b>  | 1.388(10) |
| <b>S1—C3</b>   | 1.729(5)  |
| <b>S2—C3</b>   | 1.715(5)  |
