# Supplementary material for: Chiral diethyl-EDT-TTF and tetraethyl-BEDT-TTF: synthesis, structural characterization, radical cation salt and charge transfer complexes
Source: Royal Society of Chemistry journal article supplement (doi:10.1039/d2ce00857b), 2022-01-01
Supplement: d2ce00857b2.pdf [file d2ce00857b2.pdf]

## 1. MOLECULE

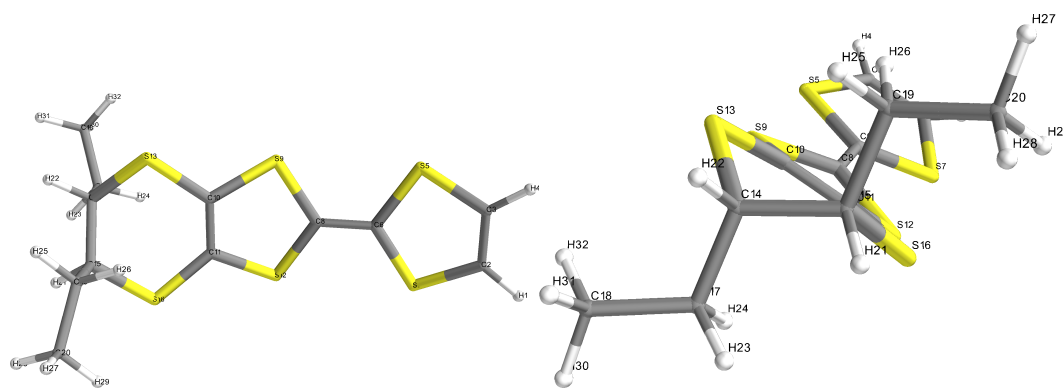

Figure 1: Chemical structure diagram with atomic numbering from two points of view.

|                   |                                                                                                                                            |
|-------------------|--------------------------------------------------------------------------------------------------------------------------------------------|
| Directory name    | SSdeEDTTTF_ax_ext                                                                                                                          |
| Formula           | C <sub>12</sub> H <sub>14</sub> S <sub>6</sub>                                                                                             |
| Charge            | 0                                                                                                                                          |
| Spin multiplicity | 1                                                                                                                                          |
| Monoisotopic mass | 349.94198 Da                                                                                                                               |
| InChI             | 1S/C <sub>12</sub> H <sub>14</sub> S <sub>6</sub> /c1-3-7-8(4-2)16-12-11(15-7)17-10(18-12)9-13-5-6-14-9/h5-8H,3-4H2,1-2H3/t7-,8-<br>/m0/s1 |
| SMILES            | C1=CS/C(=C/2\SC3=C(S2)S[C@H]([C@@H](S3)CC)CC)/S1                                                                                           |

## 2. COMPUTATIONAL DETAILS

|                                                         |                   |               |
|---------------------------------------------------------|-------------------|---------------|
| Software                                                | Gaussian          | (2009+D.01)   |
| Computational method                                    | DFT               |               |
| Functional                                              | PBE1PBE           |               |
| Basis set name                                          | 6-311++G(3df,2pd) |               |
| Number of basis set functions                           | 960               |               |
| Closed shell calculation                                | True              |               |
| Requested SCF convergence on RMS and Max density matrix | 1e-08             | 1e-06         |
| Requested SCF convergence on energy                     | 1e-06             |               |
| Job type: Geometry optimization                         |                   |               |
| Max Force value and threshold                           | 0.000009          | 0.000450      |
| RMS Force value and threshold                           | 0.000002          | 0.000300      |
| Max Displacement value and threshold                    | 0.000398          | 0.001800      |
| RMS Displacement value and threshold                    | 0.000108          | 0.001200      |
| Job type: Time-dependent calculation                    |                   |               |
| Number of calculated excited states and spin state      | 40                | ['Singlet-A'] |
| Job type: Frequency and thermochemical analysis         |                   |               |
| Temperature                                             | 298.15 K          |               |
| Anharmonic effects                                      | None              |               |
| Anharmonic effects                                      | None              |               |

## 3. RESULTS

|                        |                      |
|------------------------|----------------------|
| Total molecular energy | -2853.67768 hartrees |
| HOMO number            | 91                   |
| LUMO+1 energies        | -0.63 eV             |
| LUMO energies          | -1.01 eV             |
| HOMO energies          | -4.92 eV             |
| HOMO-1 energies        | -6.00 eV             |

|                                        |                     |
|----------------------------------------|---------------------|
| Geometry optimization specific results |                     |
| Converged nuclear repulsion energy     | 2202.67569 Hartrees |

Frequency and Thermochemistry specific results

Enthalpy at 298.15 K  
Gibbs free energy at 298.15 K  
Entropy at 298.15 K

-2853.42218 Hartrees  
-2853.49332 Hartrees  
0.00024 Hartrees

Mean Mulliken atomic charge and standard deviation  
Atoms with negatives charges under the standard deviation

| N <sup>Å°</sup> | Mulliken charge |
|-----------------|-----------------|
| S 9             | -0.775          |
| S 12            | -0.770          |
| S 13            | -0.747          |
| S 16            | -0.668          |
| S 7             | -0.507          |
| S 5             | -0.487          |

Atoms with positives charges over the standard deviation

| N <sup>Å°</sup> | Mulliken charge |
|-----------------|-----------------|
| C 8             | +0.460          |
| C 6             | +0.650          |
| C 11            | +0.836          |
| C 10            | +0.956          |

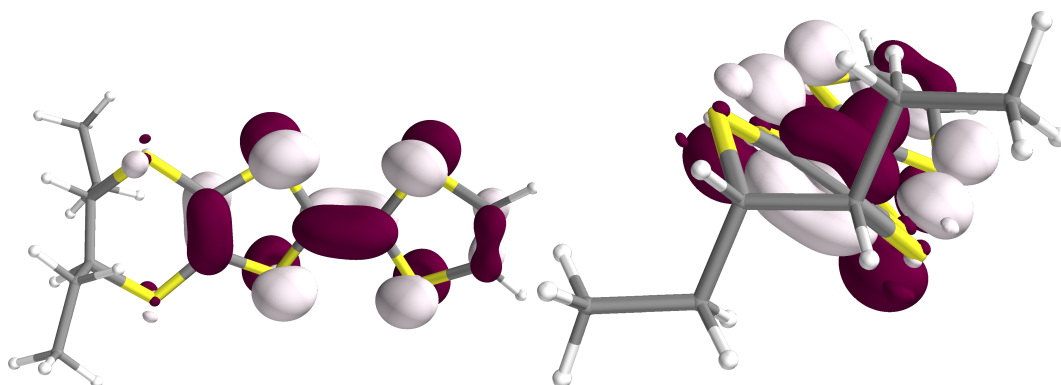

Figure 2: Representation of the HOMO from two points of view.

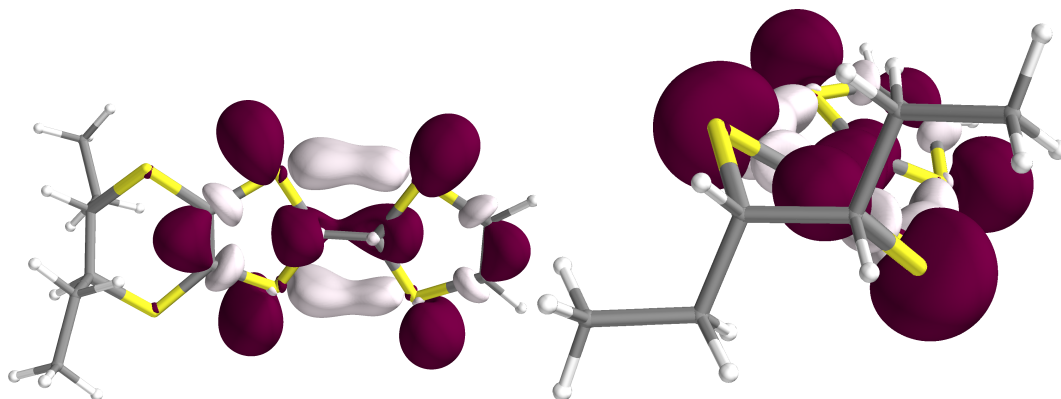

Figure 3: Representation of the LUMO from two points of view.

Table. First five calculated mono-electronic excitations and those with  $f > 0.1$  or  $R > 10$ .

| E.S. | Symmetry  | nm  | cm <sup>-1</sup> | $f$   | R     | $\Lambda$ | $d_{CT}$ | $q_{CT}$ | Excitation description : initial OM - ending OM (% if > 5%) |
|------|-----------|-----|------------------|-------|-------|-----------|----------|----------|-------------------------------------------------------------|
| 1    | Singlet-A | 462 | 21607            | 0.003 | 0.9   | 0.58      | 18.07    | 0.66     | 91-92(97);                                                  |
| 2    | Singlet-A | 379 | 26360            | 0.016 | -11.9 | 0.63      | 60.02    | 0.59     | 91-93(93);                                                  |
| 3    | Singlet-A | 332 | 30051            | 0.062 | -0.1  | 0.50      | 127.51   | 0.53     | 90-92(46); 91-94(31); 91-100(7);                            |
| 4    | Singlet-A | 324 | 30774            | 0.019 | 29.2  | 0.53      | 357.40   | 0.56     | 91-94(11); 91-95(29); 91-96(49); 91-97(6);                  |
| 5    | Singlet-A | 321 | 31078            | 0.044 | -6.2  | 0.47      | 384.53   | 0.56     | 91-94(11); 91-95(7); 91-97(65);                             |
| 6    | Singlet-A | 308 | 32429            | 0.248 | 10.8  | 0.54      | 27.91    | 0.48     | 90-92(24); 91-94(40); 91-96(6); 91-97(12);                  |
| 9    | Singlet-A | 287 | 34763            | 0.019 | -14.7 | 0.43      | 173.83   | 0.57     | 91-95(12); 91-96(6); 91-98(19); 91-100(43);                 |
| 10   | Singlet-A | 281 | 35504            | 0.015 | -10.1 | 0.43      | 185.01   | 0.53     | 90-93(19); 90-97(9); 91-101(33); 91-105(17);                |
| 13   | Singlet-A | 268 | 37282            | 0.024 | -51.7 | 0.41      | 133.76   | 0.54     | 90-93(28); 91-99(25); 91-102(20); 91-103(9);                |
| 15   | Singlet-A | 263 | 37990            | 0.008 | 24.0  | 0.33      | 309.32   | 0.58     | 90-94(6); 91-99(24); 91-103(8); 91-104(23); 91-106(10);     |
| 16   | Singlet-A | 261 | 38281            | 0.059 | 18.1  | 0.42      | 236.20   | 0.57     | 90-94(75); 91-101(9);                                       |
| 20   | Singlet-A | 249 | 40046            | 0.019 | -17.5 | 0.34      | 328.38   | 0.59     | 91-104(8); 91-106(29); 91-107(24); 91-108(7); 91-109(7);    |
| 21   | Singlet-A | 246 | 40514            | 0.019 | -42.3 | 0.44      | 194.72   | 0.49     | 90-95(31); 90-96(25); 91-107(10);                           |
| 24   | Singlet-A | 241 | 41413            | 0.026 | 36.7  | 0.43      | 185.84   | 0.49     | 90-95(7); 90-96(43); 91-107(11); 91-108(7);                 |
| 25   | Singlet-A | 237 | 42086            | 0.034 | 17.0  | 0.38      | 162.24   | 0.53     | 88-92(14); 90-95(22); 90-100(9); 91-109(13); 91-112(8);     |
| 31   | Singlet-A | 225 | 44254            | 0.062 | 22.4  | 0.39      | 230.67   | 0.50     | 88-92(29); 89-93(28); 90-98(6);                             |
| 35   | Singlet-A | 219 | 45504            | 0.008 | 12.9  | 0.29      | 141.91   | 0.56     | 90-99(32); 90-103(14); 90-105(17);                          |
| 38   | Singlet-A | 215 | 46441            | 0.026 | 11.0  | 0.29      | 237.98   | 0.50     | 89-94(48); 90-102(7); 91-113(7);                            |
| 39   | Singlet-A | 214 | 46609            | 0.006 | -18.7 | 0.31      | 130.62   | 0.55     | 89-94(9); 90-102(46); 90-104(11);                           |

Table. Most intense (&gt; 50 km/mol) molecular vibrations in wavenumbers

| Frequencies | Intensity | Symmetry |
|-------------|-----------|----------|
| 656         | 57        | A        |

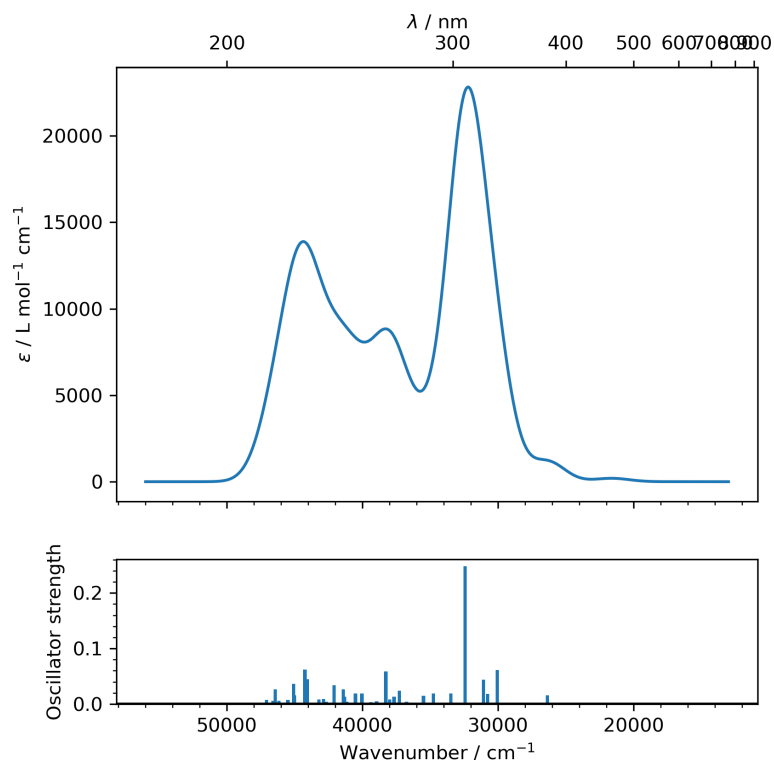Figure 4: Calculated UV visible Absorption spectrum with a gaussian broadening (FWHM = 3000 cm<sup>-1</sup>)

Table. Converged cartesian atomic coordinates in Angstroms

| Atom | X       | Y       | Z      |
|------|---------|---------|--------|
| H    | -6.2064 | 1.5613  | 0.0512 |
| C    | -5.3760 | 0.8746  | 0.1302 |
| C    | -5.3777 | -0.2406 | 0.8570 |
| H    | -6.2098 | -0.5882 | 1.4522 |
| S    | -3.9569 | -1.2387 | 0.8003 |

|   |         |         |         |
|---|---------|---------|---------|
| C | -3.0080 | -0.0797 | -0.1091 |
| S | -3.9527 | 1.2224  | -0.8036 |
| C | -1.6785 | -0.1944 | -0.2796 |
| S | -0.7325 | -1.5082 | 0.3761  |
| C | 0.7859  | -0.6283 | 0.2754  |
| C | 0.7858  | 0.4984  | -0.4562 |
| S | -0.7359 | 0.9307  | -1.2278 |
| S | 2.1319  | -1.3856 | 1.0744  |
| C | 3.4968  | -0.6742 | 0.1081  |
| C | 3.4642  | 0.8573  | 0.1427  |
| S | 2.1148  | 1.5465  | -0.8645 |
| C | 3.6010  | -1.2600 | -1.2939 |
| C | 4.0007  | -2.7247 | -1.3146 |
| C | 3.4912  | 1.4418  | 1.5500  |
| C | 3.8173  | 2.9241  | 1.5888  |
| H | 4.3487  | 1.2052  | -0.4032 |
| H | 4.3721  | -0.9803 | 0.6918  |
| H | 4.3385  | -0.6656 | -1.8450 |
| H | 2.6503  | -1.1195 | -1.8128 |
| H | 4.2399  | 0.8834  | 2.1242  |
| H | 2.5320  | 1.2501  | 2.0344  |
| H | 3.8315  | 3.2888  | 2.6167  |
| H | 4.7979  | 3.1280  | 1.1510  |
| H | 3.0758  | 3.5056  | 1.0388  |
| H | 4.0638  | -3.0922 | -2.3396 |
| H | 4.9764  | -2.8782 | -0.8466 |
| H | 3.2726  | -3.3393 | -0.7834 |

---

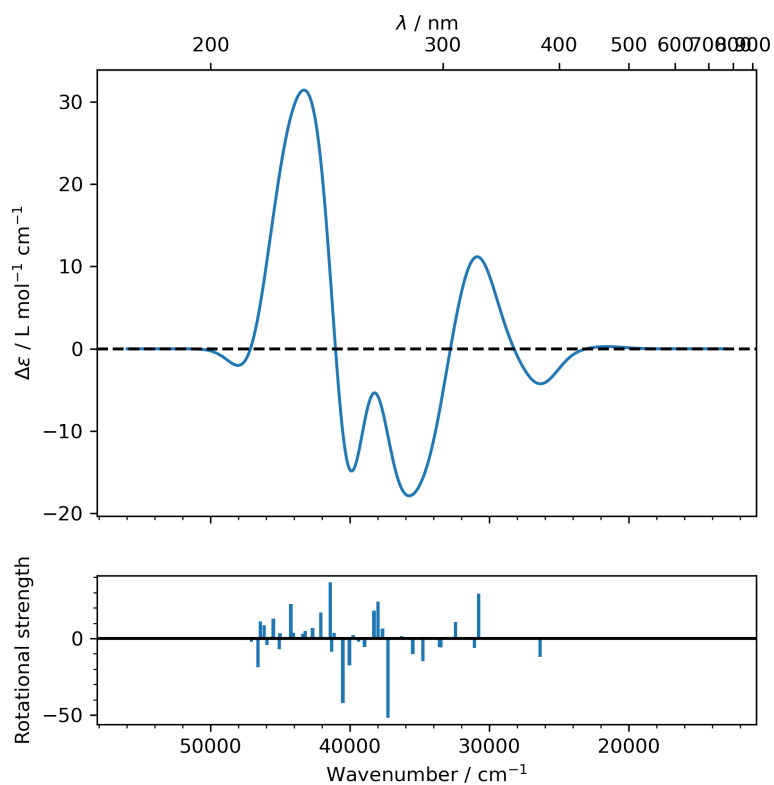

Figure 5: Calculated Circular Dichroism spectrum with a gaussian broadening (FWHM = 3000  $\text{cm}^{-1}$ )

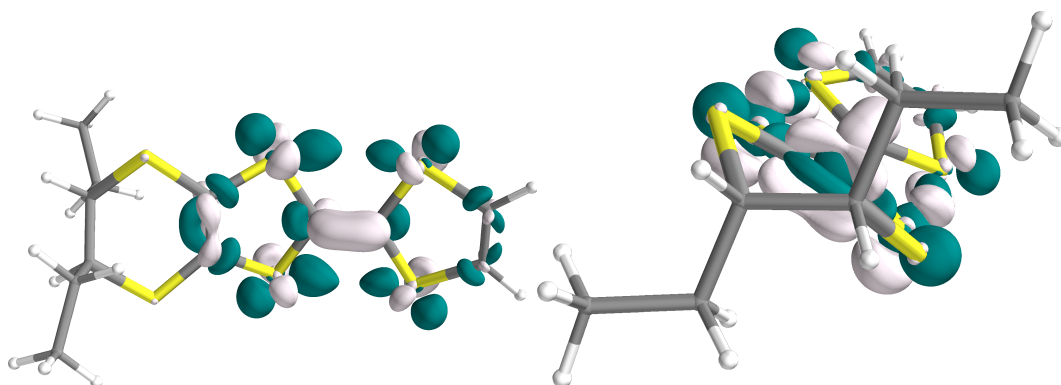

Figure 6: Representation of the Electron Density Difference (S1-S0) from two points of view.

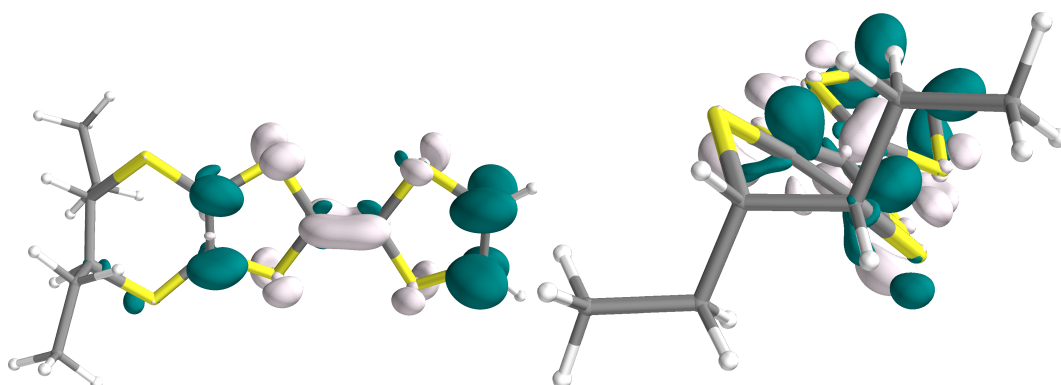

Figure 7: Representation of the Electron Density Difference (S2-S0) from two points of view.

## 1. MOLECULE

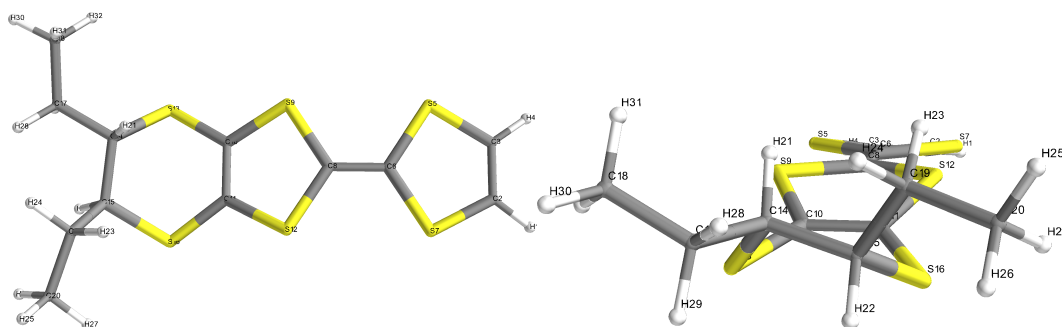

Figure 1: Chemical structure diagram with atomic numbering from two points of view.

|                   |                                                                                                     |
|-------------------|-----------------------------------------------------------------------------------------------------|
| Directory name    | SSdeEDTTTF_eq_ext                                                                                   |
| Formula           | C12H14S6                                                                                            |
| Charge            | 0                                                                                                   |
| Spin multiplicity | 1                                                                                                   |
| Monoisotopic mass | 349.94198 Da                                                                                        |
| InChI             | 1S/C12H14S6/c1-3-7-8(4-2)16-12-11(15-7)17-10(18-12)9-13-5-6-14-9/h5-8H,3-4H2,1-2H3/t7-,8-<br>/m0/s1 |
| SMILES            | C1=CS/C(=C/2\SC3=C(S2)S[C@H]([C@@H](S3)CC)CC)/S1                                                    |

## 2. COMPUTATIONAL DETAILS

|                                                         |                   |               |
|---------------------------------------------------------|-------------------|---------------|
| Software                                                | Gaussian          | (2009+D.01)   |
| Computational method                                    | DFT               |               |
| Functional                                              | PBE1PBE           |               |
| Basis set name                                          | 6-311++G(3df,2pd) |               |
| Number of basis set functions                           | 960               |               |
| Closed shell calculation                                | True              |               |
| Requested SCF convergence on RMS and Max density matrix | 1e-08             | 1e-06         |
| Requested SCF convergence on energy                     | 1e-06             |               |
| Job type: Geometry optimization                         |                   |               |
| Max Force value and threshold                           | 0.000029          | 0.000450      |
| RMS Force value and threshold                           | 0.000006          | 0.000300      |
| Max Displacement value and threshold                    | 0.001409          | 0.001800      |
| RMS Displacement value and threshold                    | 0.000440          | 0.001200      |
| Job type: Time-dependent calculation                    |                   |               |
| Number of calculated excited states and spin state      | 40                | ['Singlet-A'] |
| Job type: Frequency and thermochemical analysis         |                   |               |
| Temperature                                             | 298.15 K          |               |
| Anharmonic effects                                      | None              |               |
| Anharmonic effects                                      | None              |               |

## 3. RESULTS

|                        |                      |
|------------------------|----------------------|
| Total molecular energy | -2853.67575 hartrees |
| HOMO number            | 91                   |
| LUMO+1 energies        | -0.84 eV             |
| LUMO energies          | -0.96 eV             |
| HOMO energies          | -4.95 eV             |
| HOMO-1 energies        | -6.35 eV             |

|                                        |                     |
|----------------------------------------|---------------------|
| Geometry optimization specific results |                     |
| Converged nuclear repulsion energy     | 2176.13942 Hartrees |

|                                                |                      |
|------------------------------------------------|----------------------|
| Frequency and Thermochemistry specific results |                      |
| Enthalpy at 298.15 K                           | -2853.42031 Hartrees |
| Gibbs free energy at 298.15 K                  | -2853.49181 Hartrees |

Entropy at 298.15 K

0.00024 Hartrees

Mean Mulliken atomic charge and standard deviation  
 Atoms with negatives charges under the standard deviation

0.0000 e-  
 NÅ°  
 S 16 -0.837  
 S 12 -0.810  
 S 13 -0.694  
 S 9 -0.618  
 S 5 -0.512  
 S 7 -0.492

Atoms with positives charges over the standard deviation

NÅ°  
 Mulliken charge  
 C 8 +0.465  
 C 11 +0.571  
 C 6 +0.682  
 C 10 +1.231

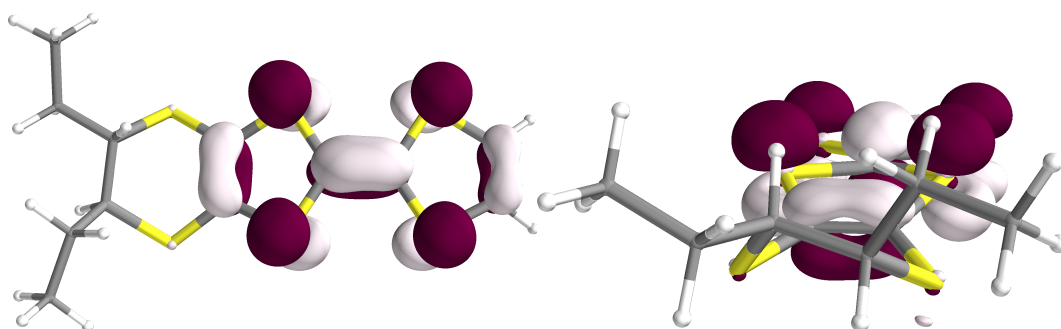

Figure 2: Representation of the HOMO from two points of view.

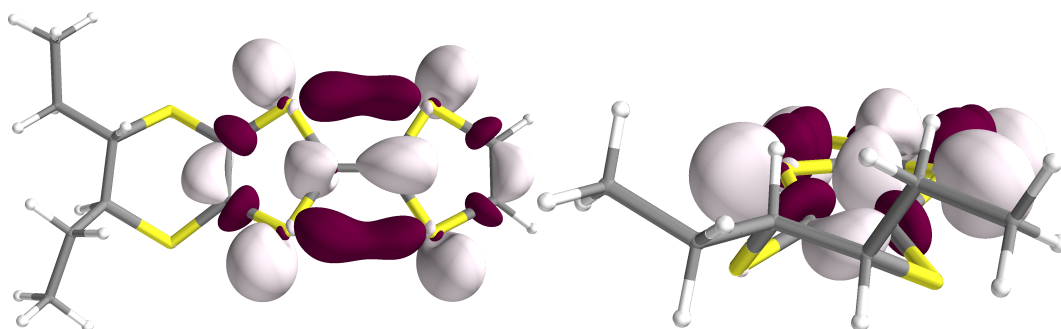

Figure 3: Representation of the LUMO from two points of view.

Table. First five calculated mono-electronic excitations and those with  $f > 0.1$  or  $R > 10$ .

| E.S. | Symmetry  | nm  | cm <sup>-1</sup> | $f$   | R     | $\Lambda$ | $d_{CT}$ | $q_{CT}$ | Excitation description : initial OM - ending OM (% if > 5%)                     |
|------|-----------|-----|------------------|-------|-------|-----------|----------|----------|---------------------------------------------------------------------------------|
| 1    | Singlet-A | 450 | 22178            | 0.005 | -0.5  | 0.58      | 12.02    | 0.64     | 91-92(96);                                                                      |
| 2    | Singlet-A | 391 | 25543            | 0.025 | -3.0  | 0.60      | 295.99   | 0.61     | 91-93(94);                                                                      |
| 3    | Singlet-A | 338 | 29567            | 0.001 | -5.0  | 0.59      | 248.70   | 0.64     | 91-95(92);                                                                      |
| 4    | Singlet-A | 322 | 30970            | 0.227 | 11.2  | 0.61      | 107.58   | 0.45     | 90-92(12); 91-94(70);                                                           |
| 5    | Singlet-A | 302 | 33066            | 0.012 | -1.8  | 0.44      | 68.34    | 0.59     | 91-98(17); 91-100(68);                                                          |
| 6    | Singlet-A | 301 | 33205            | 0.108 | -3.0  | 0.41      | 347.13   | 0.55     | 90-92(11); 91-94(17); 91-96(17); 91-98(7);<br>91-99(11); 91-101(7); 91-102(15); |
| 13   | Singlet-A | 265 | 37595            | 0.029 | -15.8 | 0.56      | 268.79   | 0.45     | 90-93(62); 91-101(14);                                                          |
| 17   | Singlet-A | 248 | 40174            | 0.086 | -25.5 | 0.48      | 316.41   | 0.54     | 89-93(53); 90-94(22);                                                           |
| 23   | Singlet-A | 236 | 42199            | 0.021 | 12.8  | 0.47      | 192.11   | 0.47     | 90-95(41); 91-109(17); 91-110(16);                                              |
| 25   | Singlet-A | 232 | 42949            | 0.008 | -12.0 | 0.33      | 267.36   | 0.57     | 91-106(15); 91-107(6); 91-110(7); 91-111(46);                                   |
| 29   | Singlet-A | 224 | 44542            | 0.005 | 29.0  | 0.47      | 29.54    | 0.47     | 87-92(6); 88-93(48); 91-113(12);                                                |
| 31   | Singlet-A | 222 | 44867            | 0.004 | 15.2  | 0.31      | 127.68   | 0.53     | 90-96(10); 90-97(15); 90-99(9); 90-100(10);<br>91-112(13); 91-113(9);           |
| 32   | Singlet-A | 221 | 45147            | 0.003 | -24.3 | 0.36      | 126.93   | 0.50     | 87-92(14); 90-95(6); 90-96(22); 90-98(8);<br>90-100(20);                        |
| 40   | Singlet-A | 210 | 47570            | 0.018 | 13.3  | 0.30      | 292.46   | 0.52     | 90-98(6); 90-99(6); 91-115(6); 91-117(27);<br>91-119(14);                       |

Table. Most intense (&gt; 50 km/mol) molecular vibrations in wavenumbers

| Frequencies | Intensity | Symmetry |
|-------------|-----------|----------|
| 656         | 57        | A        |

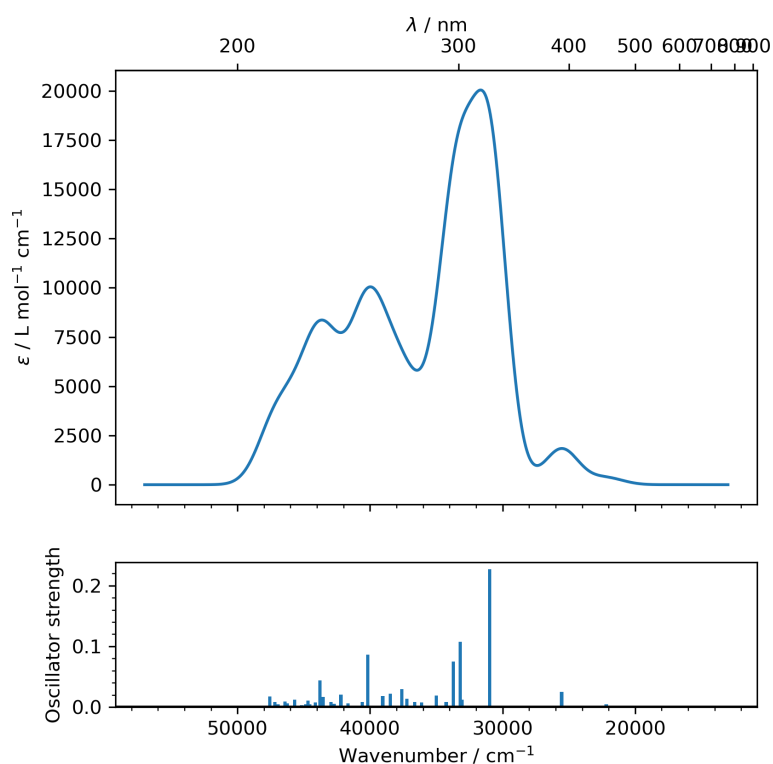

Figure 4: Calculated UV visible Absorption spectrum with a gaussian broadening (FWHM = 3000 cm-1)

Table. Converged cartesian atomic coordinates in Angstroms

| Atom | X       | Y       | Z       |
|------|---------|---------|---------|
| H    | -6.4393 | 1.3092  | -0.2847 |
| C    | -5.5744 | 0.6824  | -0.1217 |
| C    | -5.5864 | -0.6485 | -0.1343 |
| H    | -6.4624 | -1.2565 | -0.3088 |
| S    | -4.0932 | -1.4686 | 0.2062  |
| C    | -3.1244 | -0.0083 | 0.1982  |
| S    | -4.0668 | 1.4688  | 0.2342  |
| C    | -1.7791 | -0.0210 | 0.1935  |
| S    | -0.8298 | -1.4943 | 0.2015  |
| C    | 0.5880  | -0.7086 | -0.4579 |
| C    | 0.6049  | 0.6366  | -0.4399 |
| S    | -0.8032 | 1.4351  | 0.2274  |
| S    | 1.9951  | -1.6108 | -0.9016 |
| C    | 3.1978  | -0.7163 | 0.1503  |
| C    | 3.4094  | 0.7442  | -0.2439 |
| S    | 1.9450  | 1.5808  | -0.9921 |
| C    | 4.5124  | -1.4954 | 0.1134  |
| C    | 4.4679  | -2.8207 | 0.8551  |
| C    | 3.9278  | 1.5605  | 0.9396  |
| C    | 4.4501  | 2.9337  | 0.5564  |
| H    | 2.7749  | -0.7492 | 1.1583  |
| H    | 4.1347  | 0.7791  | -1.0634 |
| H    | 3.1217  | 1.6516  | 1.6734  |
| H    | 4.7294  | 0.9948  | 1.4268  |
| H    | 4.8110  | 3.4708  | 1.4345  |
| H    | 5.2796  | 2.8564  | -0.1507 |
| H    | 3.6684  | 3.5389  | 0.0943  |
| H    | 5.2952  | -0.8644 | 0.5439  |
| H    | 4.7948  | -1.6530 | -0.9329 |
| H    | 5.4326  | -3.3268 | 0.7988  |
| H    | 4.2311  | -2.6699 | 1.9106  |
| H    | 3.7129  | -3.4882 | 0.4383  |



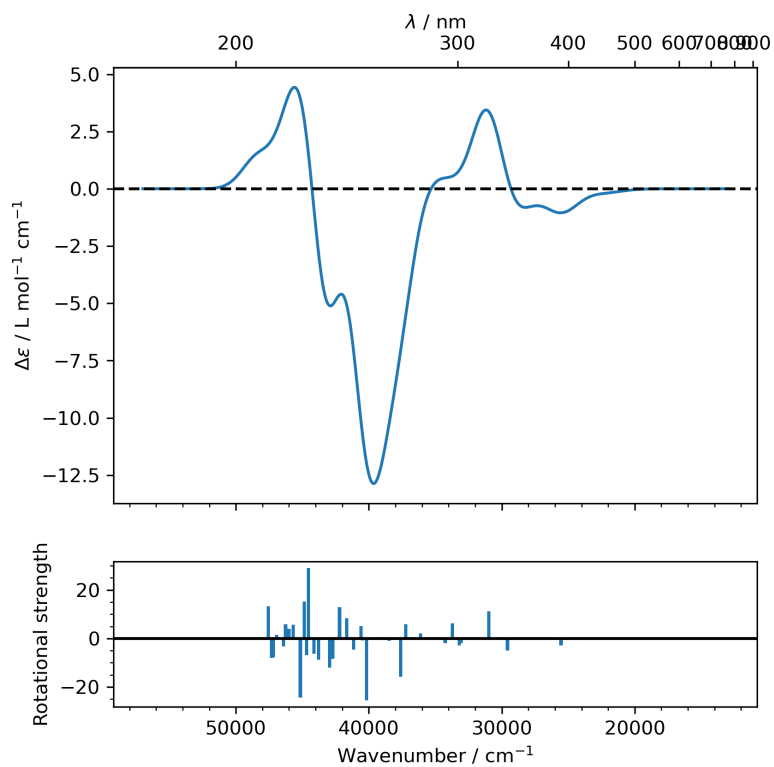

Figure 5: Calculated Circular Dichroism spectrum with a gaussian broadening (FWHM = 3000  $\text{cm}^{-1}$ )

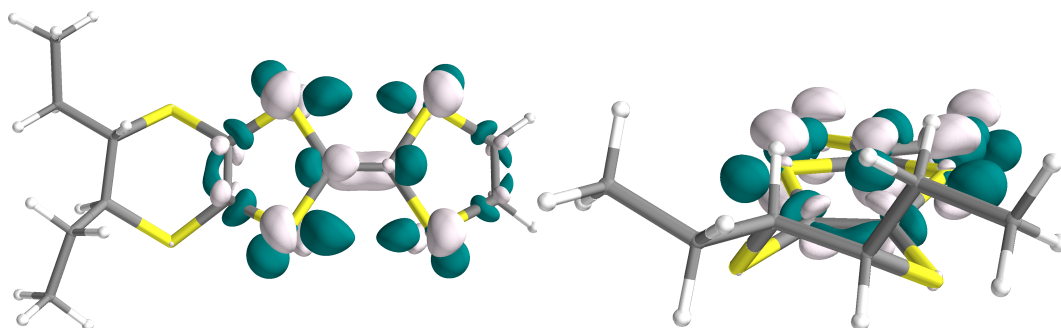

Figure 6: Representation of the Electron Density Difference (S1-S0) from two points of view.

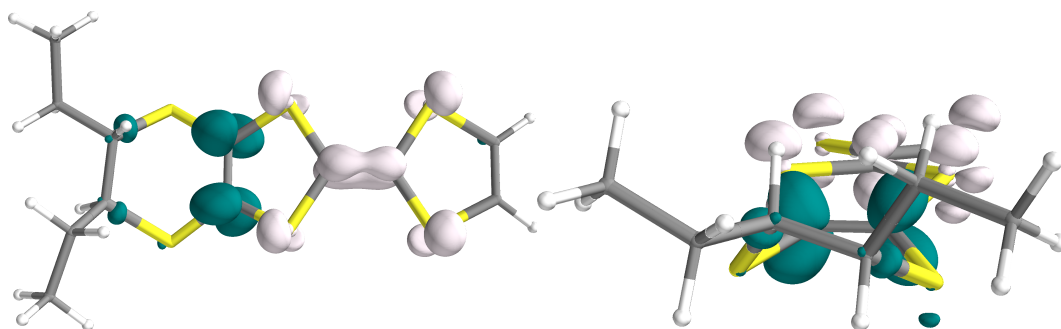

Figure 7: Representation of the Electron Density Difference (S2-S0) from two points of view.

## 1. MOLECULE

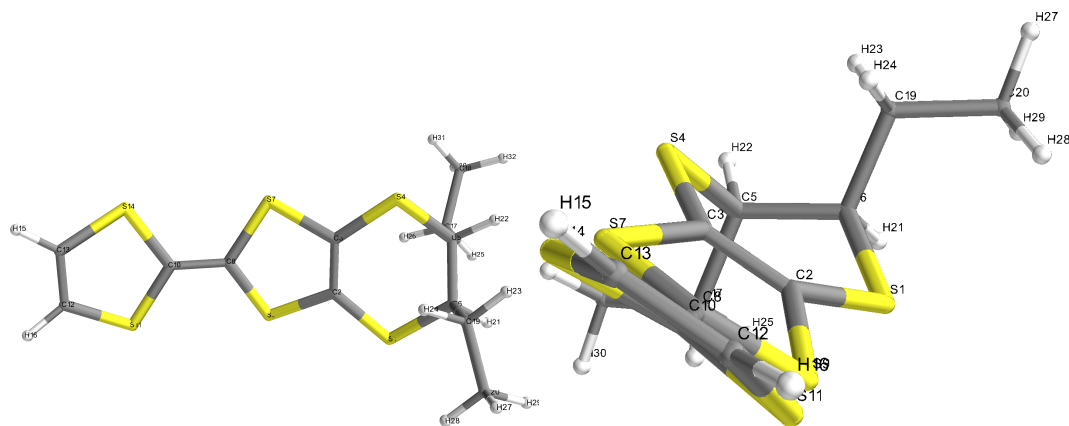

Figure 1: Chemical structure diagram with atomic numbering from two points of view.

|                   |                                                                                                 |
|-------------------|-------------------------------------------------------------------------------------------------|
| Directory name    | RRdeEDTTTTF_ax_ext                                                                              |
| Formula           | C12H14S6                                                                                        |
| Charge            | 0                                                                                               |
| Spin multiplicity | 1                                                                                               |
| Monoisotopic mass | 349.94198 Da                                                                                    |
| InChI             | 1S/C12H14S6/c1-3-7-8(4-2)16-12-11(15-7)17-10(18-12)9-13-5-6-14-9/h5-8H,3-4H2,1-2H3/t7-,8-/m1/s1 |
| SMILES            | S1C2=C(S[C@@H])([C@H]1CC)CC)S/C(=C\1/SC=CS1)/S2                                                 |

## 2. COMPUTATIONAL DETAILS

|                                                         |                   |               |
|---------------------------------------------------------|-------------------|---------------|
| Software                                                | Gaussian          | (2009+D.01)   |
| Computational method                                    | DFT               |               |
| Functional                                              | PBE1PBE           |               |
| Basis set name                                          | 6-311++G(3df,2pd) |               |
| Number of basis set functions                           | 960               |               |
| Closed shell calculation                                | True              |               |
| Requested SCF convergence on RMS and Max density matrix | 1e-08             | 1e-06         |
| Requested SCF convergence on energy                     | 1e-06             |               |
| Job type: Geometry optimization                         |                   |               |
| Max Force value and threshold                           | 0.000012          | 0.000450      |
| RMS Force value and threshold                           | 0.000002          | 0.000300      |
| Max Displacement value and threshold                    | 0.001142          | 0.001800      |
| RMS Displacement value and threshold                    | 0.000302          | 0.001200      |
| Job type: Time-dependent calculation                    |                   |               |
| Number of calculated excited states and spin state      | 40                | ['Singlet-A'] |

## 3. RESULTS

|                                                           |                      |                 |
|-----------------------------------------------------------|----------------------|-----------------|
| Total molecular energy                                    | -2853.67768 hartrees |                 |
| HOMO number                                               | 91                   |                 |
| LUMO+1 energies                                           | -0.63 eV             |                 |
| LUMO energies                                             | -1.01 eV             |                 |
| HOMO energies                                             | -4.92 eV             |                 |
| HOMO-1 energies                                           | -6.00 eV             |                 |
| Geometry optimization specific results                    |                      |                 |
| Converged nuclear repulsion energy                        | 2202.67308 Hartrees  |                 |
| Mean Mulliken atomic charge and standard deviation        | 0.0000 e-            | 0.4042 e-       |
| Atoms with negatives charges under the standard deviation | NÅ°                  | Mulliken charge |
|                                                           | S 7                  | -0.775          |
|                                                           | S 9                  | -0.770          |

Atoms with positives charges over the standard deviation

|      |                 |
|------|-----------------|
| S 4  | -0.747          |
| S 1  | -0.668          |
| S 11 | -0.507          |
| S 14 | -0.487          |
| N 1° | Mulliken charge |
| C 8  | +0.460          |
| C 10 | +0.650          |
| C 2  | +0.836          |
| C 3  | +0.956          |

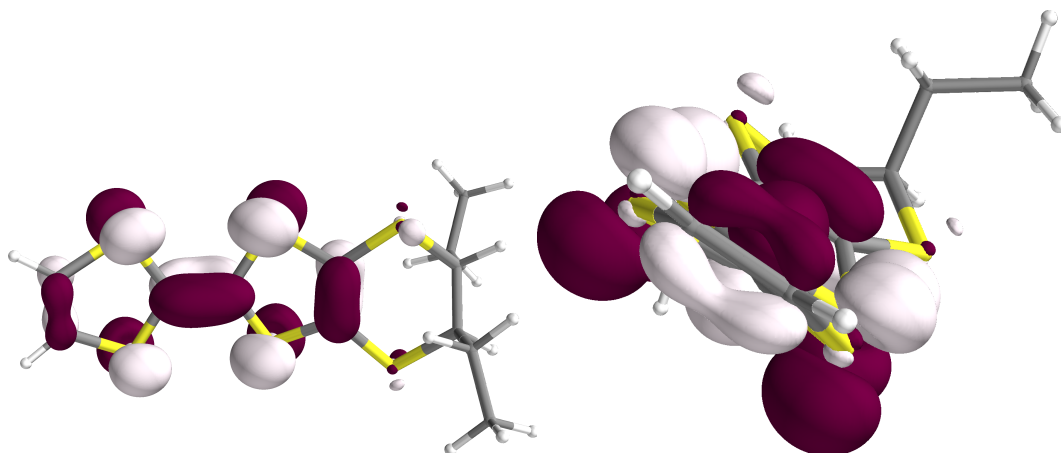

Figure 2: Representation of the HOMO from two points of view.

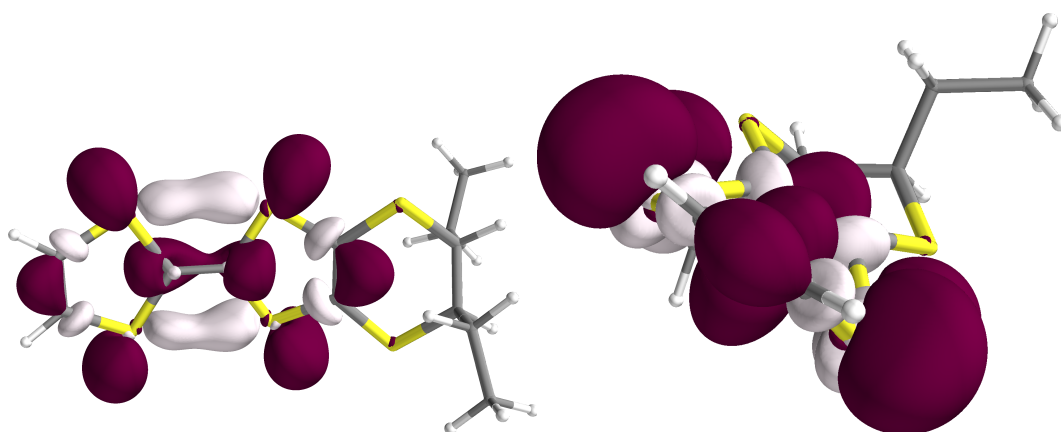

Figure 3: Representation of the LUMO from two points of view.

Table. First five calculated mono-electronic excitations and those with  $f > 0.1$  or  $R > 10$ .

| E.S. | Symmetry  | nm  | $\text{cm}^{-1}$ | $f$   | R     | $\Lambda$ | $d_{CT}$ | $q_{CT}$ | Excitation description : initial OM - ending OM (% if > 5%) |
|------|-----------|-----|------------------|-------|-------|-----------|----------|----------|-------------------------------------------------------------|
| 1    | Singlet-A | 462 | 21605            | 0.003 | -0.9  | 0.58      | 18.10    | 0.66     | 91-92(97);                                                  |
| 2    | Singlet-A | 379 | 26360            | 0.016 | 11.9  | 0.63      | 60.00    | 0.59     | 91-93(93);                                                  |
| 3    | Singlet-A | 332 | 30051            | 0.061 | 0.1   | 0.50      | 127.70   | 0.53     | 90-92(46); 91-94(31); 91-100(7);                            |
| 4    | Singlet-A | 324 | 30774            | 0.019 | -29.2 | 0.53      | 356.00   | 0.56     | 91-94(11); 91-95(29); 91-96(49); 91-97(6);                  |
| 5    | Singlet-A | 321 | 31077            | 0.044 | 6.1   | 0.47      | 384.23   | 0.56     | 91-94(11); 91-95(7); 91-97(65);                             |
| 6    | Singlet-A | 308 | 32429            | 0.248 | -10.7 | 0.54      | 27.31    | 0.48     | 90-92(24); 91-94(40); 91-96(7); 91-97(12);                  |
| 9    | Singlet-A | 287 | 34762            | 0.019 | 14.7  | 0.43      | 172.72   | 0.57     | 91-95(12); 91-96(6); 91-98(19); 91-100(43);                 |
| 10   | Singlet-A | 281 | 35504            | 0.015 | 10.1  | 0.43      | 184.73   | 0.53     | 90-93(19); 90-97(9); 91-101(33); 91-105(17);                |
| 13   | Singlet-A | 268 | 37282            | 0.024 | 51.7  | 0.41      | 132.70   | 0.54     | 90-93(28); 91-99(25); 91-102(20); 91-103(9);                |
| 15   | Singlet-A | 263 | 37989            | 0.008 | -24.0 | 0.33      | 308.51   | 0.58     | 90-94(6); 91-99(24); 91-103(8); 91-104(23); 91-106(10);     |
| 16   | Singlet-A | 261 | 38282            | 0.059 | -18.1 | 0.42      | 236.69   | 0.57     | 90-94(75); 91-101(9);                                       |
| 20   | Singlet-A | 249 | 40045            | 0.019 | 17.5  | 0.34      | 327.49   | 0.59     | 91-104(8); 91-106(29); 91-107(24); 91-108(7); 91-109(7);    |
| 21   | Singlet-A | 246 | 40515            | 0.019 | 42.3  | 0.44      | 193.32   | 0.49     | 90-95(31); 90-96(25); 91-107(10);                           |
| 24   | Singlet-A | 241 | 41413            | 0.026 | -36.7 | 0.43      | 183.66   | 0.49     | 90-95(7); 90-96(44); 91-107(11); 91-108(7);                 |
| 25   | Singlet-A | 237 | 42085            | 0.034 | -17.0 | 0.38      | 161.39   | 0.53     | 88-92(14); 90-95(22); 90-100(9); 91-109(13); 91-112(8);     |
| 31   | Singlet-A | 225 | 44254            | 0.062 | -22.5 | 0.39      | 231.81   | 0.50     | 88-92(29); 89-93(28); 90-98(6);                             |
| 35   | Singlet-A | 219 | 45504            | 0.008 | -12.9 | 0.29      | 140.54   | 0.56     | 90-99(32); 90-103(14); 90-105(17);                          |
| 38   | Singlet-A | 215 | 46442            | 0.026 | -11.1 | 0.29      | 239.16   | 0.50     | 89-94(48); 90-102(7); 91-113(6);                            |
| 39   | Singlet-A | 214 | 46609            | 0.006 | 18.9  | 0.31      | 132.54   | 0.55     | 89-94(9); 90-102(46); 90-104(11);                           |

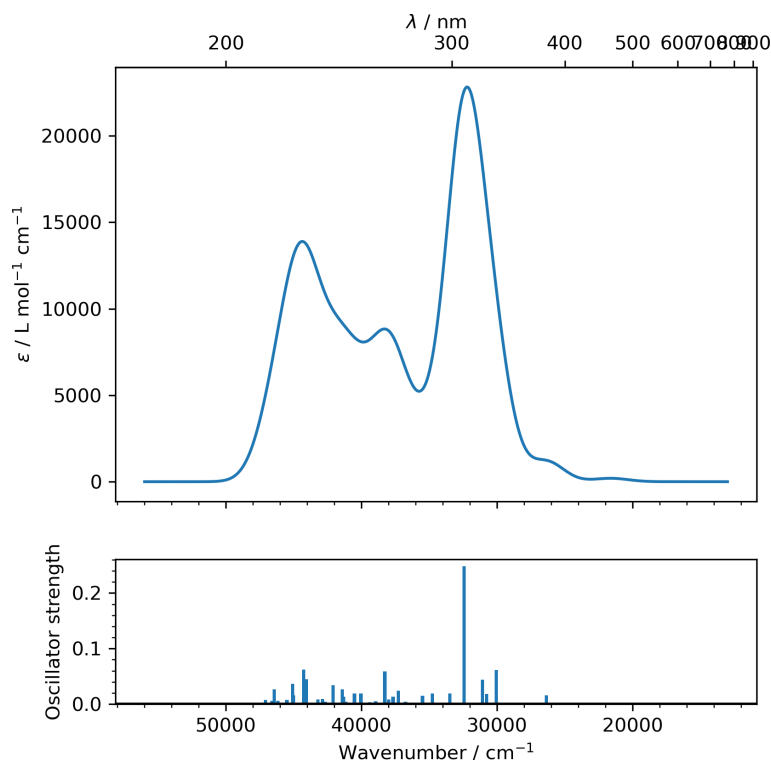Figure 4: Calculated UV visible Absorption spectrum with a gaussian broadening (FWHM = 3000  $\text{cm}^{-1}$ )

Table. Converged cartesian atomic coordinates in Angstroms

| Atom | X       | Y       | Z       |
|------|---------|---------|---------|
| S    | -2.1149 | 1.5465  | -0.8644 |
| C    | -0.7859 | 0.4985  | -0.4560 |
| C    | -0.7858 | -0.6283 | 0.2756  |
| S    | -2.1319 | -1.3856 | 1.0744  |
| C    | -3.4967 | -0.6744 | 0.1079  |
| C    | -3.4643 | 0.8572  | 0.1425  |
| S    | 0.7325  | -1.5081 | 0.3763  |
| C    | 1.6785  | -0.1943 | -0.2794 |
| S    | 0.7358  | 0.9309  | -1.2276 |

|   |         |         |         |
|---|---------|---------|---------|
| C | 3.0080  | -0.0796 | -0.1091 |
| S | 3.9526  | 1.2226  | -0.8035 |
| C | 5.3760  | 0.8747  | 0.1301  |
| C | 5.3779  | -0.2406 | 0.8568  |
| S | 3.9570  | -1.2387 | 0.8002  |
| H | 6.2100  | -0.5884 | 1.4519  |
| H | 6.2064  | 1.5614  | 0.0510  |
| C | -3.6006 | -1.2602 | -1.2941 |
| C | -4.0001 | -2.7249 | -1.3149 |
| C | -3.4917 | 1.4416  | 1.5499  |
| C | -3.8179 | 2.9240  | 1.5886  |
| H | -4.3488 | 1.2049  | -0.4035 |
| H | -4.3721 | -0.9806 | 0.6915  |
| H | -4.2404 | 0.8832  | 2.1239  |
| H | -2.5325 | 1.2500  | 2.0344  |
| H | -4.3382 | -0.6658 | -1.8453 |
| H | -2.6499 | -1.1194 | -1.8129 |
| H | -3.8323 | 3.2886  | 2.6165  |
| H | -3.0763 | 3.5055  | 1.0388  |
| H | -4.7984 | 3.1278  | 1.1506  |
| H | -4.0630 | -3.0924 | -2.3399 |
| H | -3.2720 | -3.3394 | -0.7836 |
| H | -4.9758 | -2.8786 | -0.8470 |

---

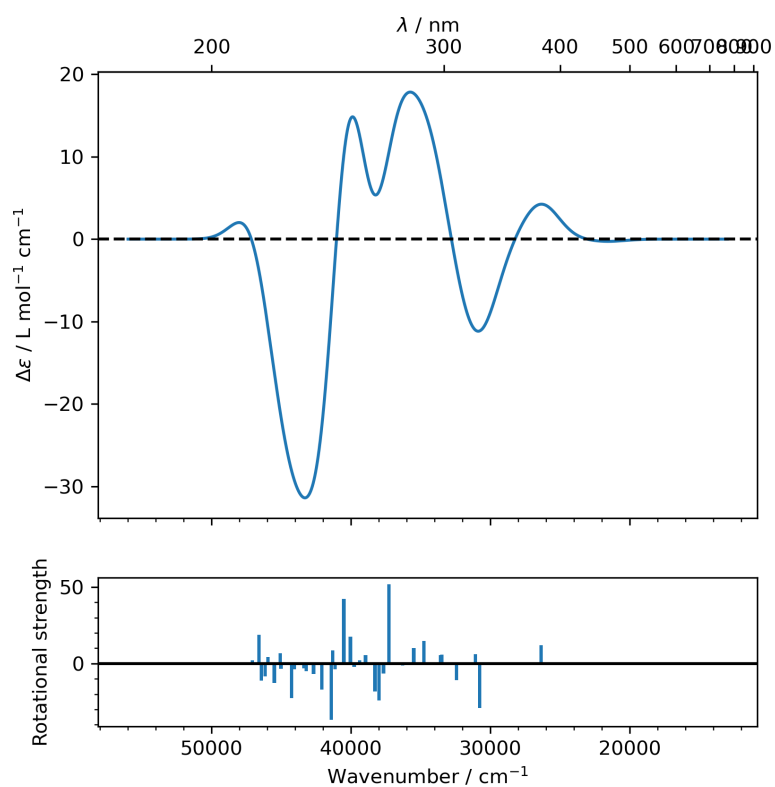

Figure 5: Calculated Circular Dichroism spectrum with a gaussian broadening (FWHM = 3000  $\text{cm}^{-1}$ )

## 1. MOLECULE

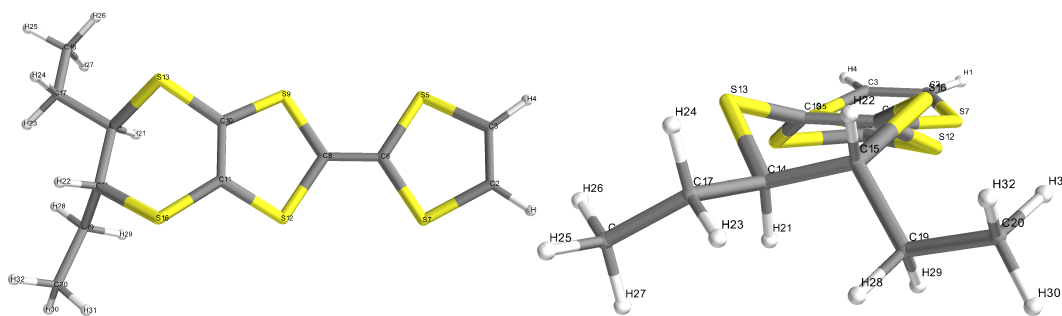

Figure 1: Chemical structure diagram with atomic numbering from two points of view.

|                   |                                                                                                     |
|-------------------|-----------------------------------------------------------------------------------------------------|
| Directory name    | RRdeEDTTTTF_eq_ext                                                                                  |
| Formula           | C12H14S6                                                                                            |
| Charge            | 0                                                                                                   |
| Spin multiplicity | 1                                                                                                   |
| Monoisotopic mass | 349.94198 Da                                                                                        |
| InChI             | 1S/C12H14S6/c1-3-7-8(4-2)16-12-11(15-7)17-10(18-12)9-13-5-6-14-9/h5-8H,3-4H2,1-2H3/t7-,8-<br>/m1/s1 |
| SMILES            | C1=CS/C(=C/2\SC3=C(S2)S[C@@H]([C@H](S3)CC)CC)/S1                                                    |

## 2. COMPUTATIONAL DETAILS

|                                                         |                   |               |
|---------------------------------------------------------|-------------------|---------------|
| Software                                                | Gaussian          | (2009+D.01)   |
| Computational method                                    | DFT               |               |
| Functional                                              | PBE1PBE           |               |
| Basis set name                                          | 6-311++G(3df,2pd) |               |
| Number of basis set functions                           | 960               |               |
| Closed shell calculation                                | True              |               |
| Requested SCF convergence on RMS and Max density matrix | 1e-08             | 1e-06         |
| Requested SCF convergence on energy                     | 1e-06             |               |
| Job type: Geometry optimization                         |                   |               |
| Max Force value and threshold                           | 0.000138          | 0.000450      |
| RMS Force value and threshold                           | 0.000013          | 0.000300      |
| Max Displacement value and threshold                    | 0.000819          | 0.001800      |
| RMS Displacement value and threshold                    | 0.000170          | 0.001200      |
| Job type: Frequency and thermochemical analysis         |                   |               |
| Temperature                                             | 298.15 K          |               |
| Anharmonic effects                                      | None              |               |
| Anharmonic effects                                      | None              |               |
| Job type: Time-dependent calculation                    |                   |               |
| Number of calculated excited states and spin state      | 40                | ['Singlet-A'] |

## 3. RESULTS

|                        |                      |
|------------------------|----------------------|
| Total molecular energy | -2853.67575 hartrees |
| HOMO number            | 91                   |
| LUMO+1 energies        | -0.84 eV             |
| LUMO energies          | -0.96 eV             |
| HOMO energies          | -4.95 eV             |
| HOMO-1 energies        | -6.35 eV             |

|                                        |                     |
|----------------------------------------|---------------------|
| Geometry optimization specific results |                     |
| Converged nuclear repulsion energy     | 2176.13999 Hartrees |

|                                                |                      |
|------------------------------------------------|----------------------|
| Frequency and Thermochemistry specific results |                      |
| Enthalpy at 298.15 K                           | -2853.42030 Hartrees |
| Gibbs free energy at 298.15 K                  | -2853.49182 Hartrees |

Entropy at 298.15 K

0.00024 Hartrees

Mean Mulliken atomic charge and standard deviation  
 Atoms with negatives charges under the standard deviation

0.0000 e-  
 NÅ°  
 S 16 -0.836  
 S 12 -0.810  
 S 13 -0.694  
 S 9 -0.618  
 S 5 -0.512  
 S 7 -0.492

Atoms with positives charges over the standard deviation

NÅ°  
 Mulliken charge  
 C 8 +0.466  
 C 11 +0.571  
 C 6 +0.682  
 C 10 +1.231

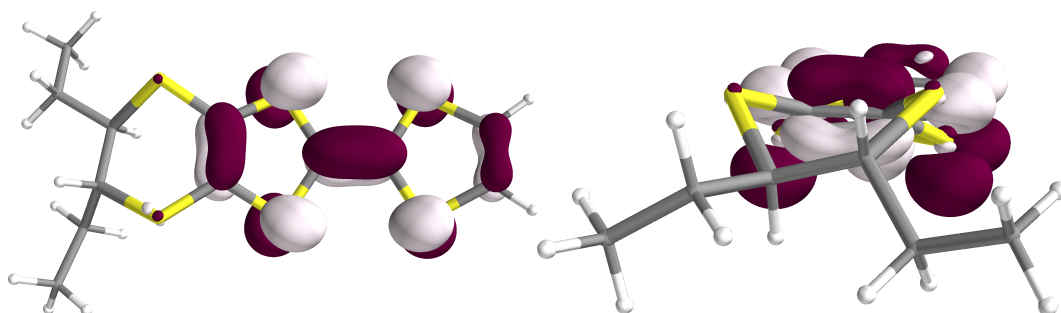

Figure 2: Representation of the HOMO from two points of view.

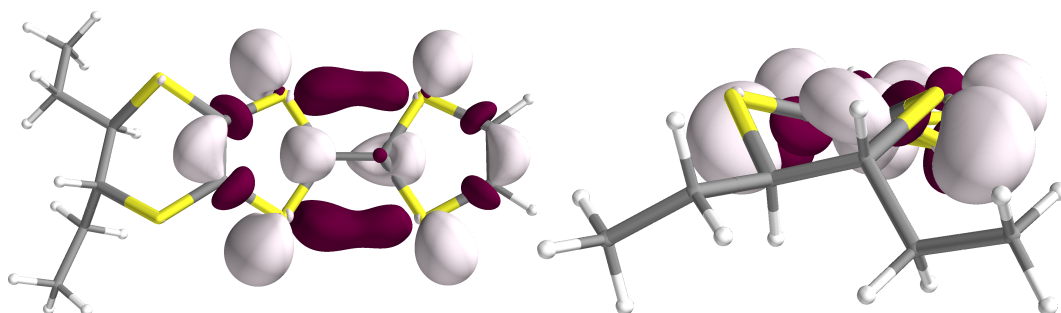

Figure 3: Representation of the LUMO from two points of view.

Table. Most intense (> 50 km/mol) molecular vibrations in wavenumbers

| Frequencies | Intensity | Symmetry |
|-------------|-----------|----------|
| 656         | 57        | A        |



Table. First five calculated mono-electronic excitations and those with  $f > 0.1$  or  $R > 10$ .

| E.S. | Symmetry  | nm  | $\text{cm}^{-1}$ | $f$   | R     | $\Lambda$ | $d_{CT}$ | $q_{CT}$ | Excitation description : initial OM - ending OM (% if > 5%)                     |
|------|-----------|-----|------------------|-------|-------|-----------|----------|----------|---------------------------------------------------------------------------------|
| 1    | Singlet-A | 450 | 22176            | 0.005 | 0.5   | 0.58      | 11.94    | 0.64     | 91-92(96);                                                                      |
| 2    | Singlet-A | 391 | 25544            | 0.025 | 2.9   | 0.60      | 296.16   | 0.61     | 91-93(94);                                                                      |
| 3    | Singlet-A | 338 | 29569            | 0.001 | 5.0   | 0.59      | 248.80   | 0.64     | 91-95(92);                                                                      |
| 4    | Singlet-A | 322 | 30971            | 0.227 | -11.2 | 0.61      | 107.76   | 0.45     | 90-92(12); 91-94(70);                                                           |
| 5    | Singlet-A | 302 | 33063            | 0.012 | 2.0   | 0.44      | 65.66    | 0.59     | 91-98(17); 91-100(68);                                                          |
| 6    | Singlet-A | 301 | 33201            | 0.108 | 2.8   | 0.41      | 347.04   | 0.55     | 90-92(11); 91-94(17); 91-96(17); 91-98(8);<br>91-99(11); 91-101(7); 91-102(15); |
| 13   | Singlet-A | 265 | 37595            | 0.029 | 15.8  | 0.56      | 268.08   | 0.45     | 90-93(62); 91-101(14);                                                          |
| 17   | Singlet-A | 248 | 40176            | 0.086 | 25.4  | 0.48      | 315.93   | 0.54     | 89-93(53); 90-94(22);                                                           |
| 23   | Singlet-A | 236 | 42200            | 0.021 | -12.8 | 0.47      | 194.29   | 0.47     | 88-93(6); 90-95(41); 91-109(17); 91-110(16);                                    |
| 25   | Singlet-A | 232 | 42949            | 0.008 | 12.1  | 0.33      | 267.43   | 0.57     | 91-106(15); 91-107(6); 91-110(7); 91-111(46);                                   |
| 29   | Singlet-A | 224 | 44542            | 0.005 | -29.4 | 0.47      | 29.42    | 0.47     | 87-92(6); 88-93(47); 91-113(12);                                                |
| 31   | Singlet-A | 222 | 44863            | 0.004 | -15.3 | 0.31      | 127.65   | 0.53     | 90-96(11); 90-97(15); 90-99(9); 90-100(10);<br>91-112(13); 91-113(9);           |
| 32   | Singlet-A | 221 | 45146            | 0.003 | 24.3  | 0.36      | 125.31   | 0.50     | 87-92(14); 90-95(6); 90-96(22); 90-98(8);<br>90-100(20);                        |
| 40   | Singlet-A | 210 | 47568            | 0.018 | -13.4 | 0.29      | 289.57   | 0.51     | 90-98(6); 90-99(6); 91-115(7); 91-117(27);<br>91-119(14);                       |

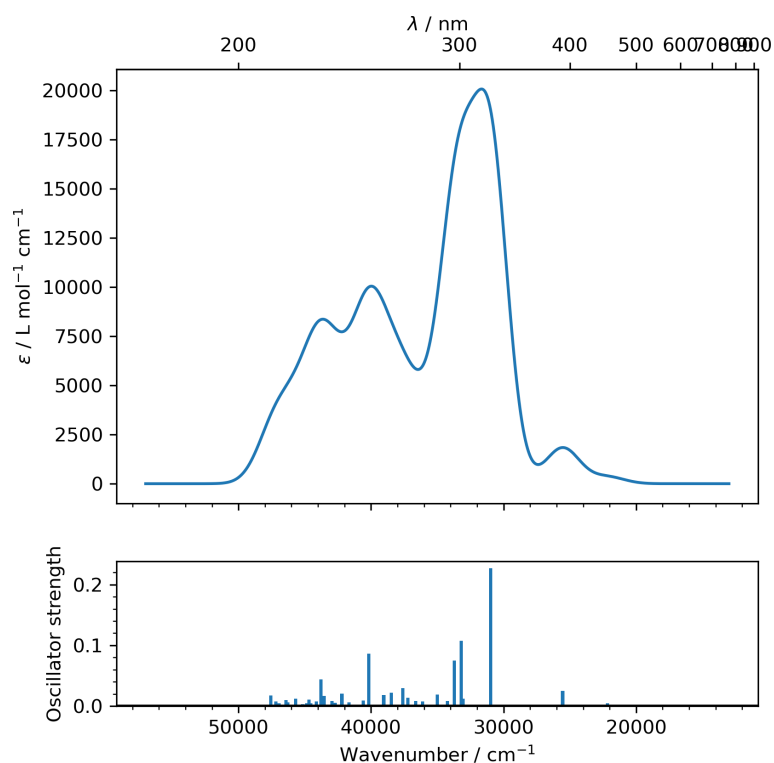Figure 4: Calculated UV visible Absorption spectrum with a gaussian broadening (FWHM = 3000  $\text{cm}^{-1}$ )

Table. Converged cartesian atomic coordinates in Angstroms

| Atom | X       | Y       | Z       |
|------|---------|---------|---------|
| H    | -6.4394 | 1.3087  | 0.2858  |
| C    | -5.5746 | 0.6819  | 0.1224  |
| C    | -5.5863 | -0.6490 | 0.1342  |
| H    | -6.4620 | -1.2569 | 0.3086  |
| S    | -4.0930 | -1.4688 | -0.2064 |
| C    | -3.1245 | -0.0084 | -0.1983 |
| S    | -4.0670 | 1.4685  | -0.2332 |
| C    | -1.7791 | -0.0211 | -0.1941 |
| S    | -0.8296 | -1.4942 | -0.2026 |
| C    | 0.5881  | -0.7086 | 0.4572  |
| C    | 0.6047  | 0.6366  | 0.4397  |
| S    | -0.8034 | 1.4352  | -0.2273 |
| S    | 1.9950  | -1.6110 | 0.9010  |
| C    | 3.1981  | -0.7162 | -0.1502 |

|   |        |         |         |
|---|--------|---------|---------|
| C | 3.4092 | 0.7444  | 0.2439  |
| S | 1.9448 | 1.5808  | 0.9924  |
| C | 4.5131 | -1.4948 | -0.1124 |
| C | 4.4696 | -2.8205 | -0.8534 |
| C | 3.9269 | 1.5608  | -0.9399 |
| C | 4.4488 | 2.9342  | -0.5571 |
| H | 2.7759 | -0.7493 | -1.1584 |
| H | 4.1347 | 0.7798  | 1.0631  |
| H | 5.2957 | -0.8635 | -0.5427 |
| H | 4.7950 | -1.6517 | 0.9341  |
| H | 5.4348 | -3.3257 | -0.7969 |
| H | 3.7153 | -3.4885 | -0.4363 |
| H | 4.2326 | -2.6704 | -1.9090 |
| H | 4.7286 | 0.9953  | -1.4272 |
| H | 3.1206 | 1.6514  | -1.6735 |
| H | 4.8092 | 3.4714  | -1.4353 |
| H | 3.6669 | 3.5391  | -0.0948 |
| H | 5.2786 | 2.8573  | 0.1498  |

---

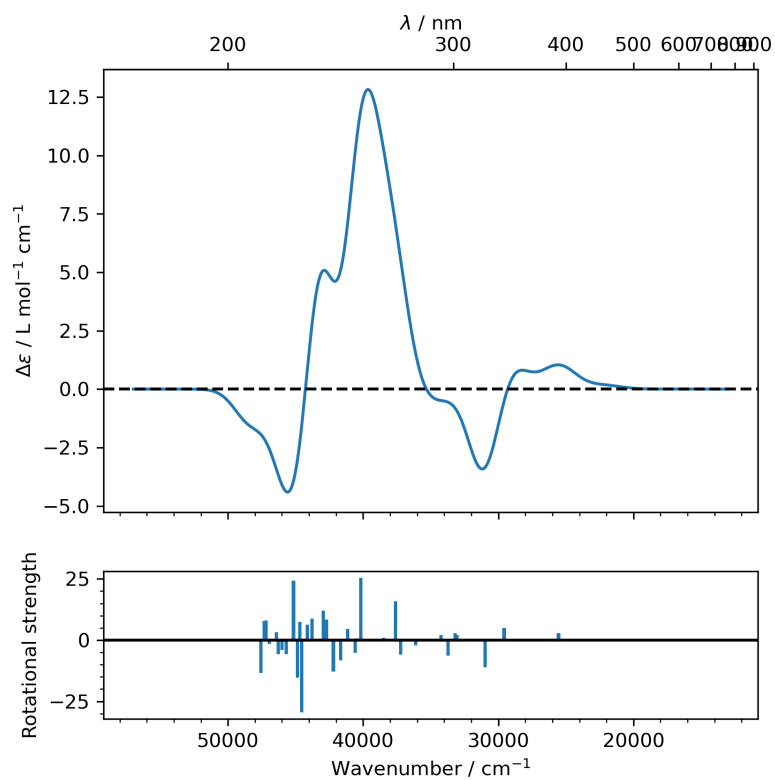

Figure 5: Calculated Circular Dichroism spectrum with a gaussian broadening (FWHM = 3000 cm-1)

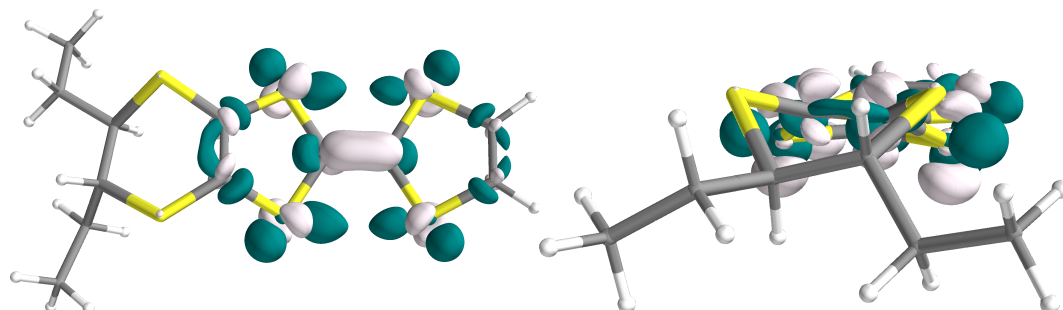

Figure 6: Representation of the Electron Density Difference (S1-S0) from two points of view.

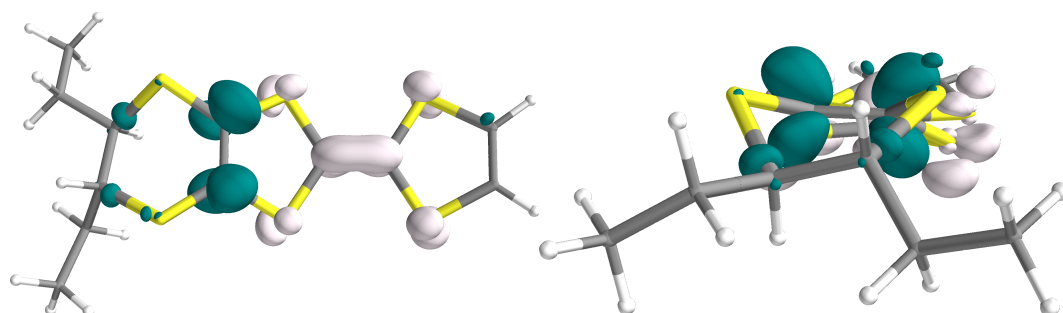

Figure 7: Representation of the Electron Density Difference (S2-S0) from two points of view.
